# Supplementary material for: Simple and robust polymer-based sensor for rapid cancer detection using serum
Source: Royal Society of Chemistry journal article supplement (doi:10.1039/c9cc04854e), 2019-01-01
Supplement: c9cc04854e1.pdf [file c9cc04854e1.pdf]

## SUPPORTING INFORMATION

### Simple and Robust Polymer-based Sensor for Rapid Cancer Detection using Serum

Ngoc D. B. Le,<sup>[a]</sup> Arvind K. Singla,<sup>[b]</sup> Yingying Geng,<sup>[a]</sup> Jinsong Han,<sup>[c]</sup> Kai Seehafer,<sup>[c]</sup> Gyan Prakash,<sup>[a]</sup> Daniel F. Moyano,<sup>[a]</sup> Charlene M. Downey,<sup>[b]</sup> Michael J. Monument,<sup>[d]</sup> Doha Itani,<sup>[e]</sup> Uwe H. F. Bunz,<sup>[c]</sup> Frank R. Jirik,<sup>[b]</sup> Vincent M. Rotello<sup>[a], \*</sup>

- [a] Department of Chemistry  
University of Massachusetts Amherst  
710 N. Pleasant St., Amherst MA 01003, U.S.A.
- [b] Department of Biochemistry and Molecular Biology  
The McCaig Institute for Bone and Joint Health  
University of Calgary  
2500 University Drive NW, Calgary, Alberta T2N 4N1, Canada.
- [c] Organisch-Chemisches Institut  
Ruprecht-Karls-Universität Heidelberg  
Im Neuenheimer Feld 270, 69120 Heidelberg, Germany
- [d] Department of Surgery  
The McCaig Institute for Bone and Joint Health  
Arnie Charbonneau Cancer Institute, University of Calgary  
2500 University Drive NW, Calgary, Alberta T2N 4N1, Canada.
- [e] Department of Pathology and Laboratory Medicine  
Calgary Laboratory Services/University of Calgary  
2500 University Drive NW, Calgary, Alberta T2N 4N1, Canada.

\*Corresponding author. E-mail: [rotello@chem.umass.edu](mailto:rotello@chem.umass.edu)

## Table of contents

|           |                                                                                |               |
|-----------|--------------------------------------------------------------------------------|---------------|
| <b>1.</b> | <b>Experimental methods and characterization</b>                               | <b>S3-7</b>   |
| <b>2.</b> | <b>Fluorescence titration</b>                                                  | <b>S7</b>     |
| <b>3.</b> | <b>Fluorescence bar graph</b>                                                  | <b>S8</b>     |
| <b>4.</b> | <b>LDA of the lung tumor model induced by H1299-EGFP-luc2 cells</b>            | <b>S8</b>     |
| <b>5.</b> | <b>H&amp;E staining of transgenic lung cancer model</b>                        | <b>S9</b>     |
| <b>6.</b> | <b>Characteristics of 8 proteins and tumor mouse models</b>                    | <b>S9</b>     |
| <b>7.</b> | <b>Fluorescence responses and unknown identification</b>                       |               |
|           | <b>7.1. from 8 proteins using PFS-PPE1 and PFS-PPE2</b>                        | <b>S10-16</b> |
|           | <b>7.2. from different concentrations of serum using PFS-PPE1 and PFS-PPE2</b> | <b>S16-23</b> |
|           | <b>7.3. from transgenic lung model (stage 1) using PFS-PPE1</b>                | <b>S24-27</b> |
|           | <b>7.4. from experimental lung model (stage 4) using PFS-PPE1</b>              | <b>S27-31</b> |

**Materials.** All chemicals and solvents for synthesis were purchased from Sigma Aldrich unless otherwise stated. Calf serum was purchased from HyClone™ Calf Serum.

**Synthesis of PPE1 and PPE2.** The synthesis and characterizations of PPE1 and PPE2 were described in previous works.<sup>1,2</sup>

**Synthesis of PFS and characterizations.** 2,7-Dibromofluorene (4 g, 12 mmol) and tetrabutylammonium bromide (80 mg) were added and to 50% wt aqueous solution of potassium hydroxide (8 mL) and DMSO (60 mL). A solution of 1,3-propane sultone, CAS 1120-71-4 Sigma (4 g, 29 mmol) in DMSO (20 mL) was slowly added the above mixture under nitrogen. Following mixture was then stirred at room temperature for 4 h and was precipitated using acetone to afford the crude product. The product was collected by filtration, washed with ethanol, recrystallized twice from ~80:20 acetone/H<sub>2</sub>O, and dried under vacuum at 60 °C for 24 h to yield 2,7-dibromo 9,9-bis(3'-sulphatepropyl)fluorene (1) as white needle crystals (4.78 g, 65%).

<sup>1</sup>H-NMR (400 MHz, CD<sub>3</sub>OD, δ ppm): 7.63 (d, 4H, J = 9.2Hz), 7.49 (dd, 2H, J = 8.0Hz, 8.0Hz), 2.49 (t, 4H, J = 7.6Hz), 2.10 (t, 4H, J = 8.0Hz), 0.91 (m, 4H).

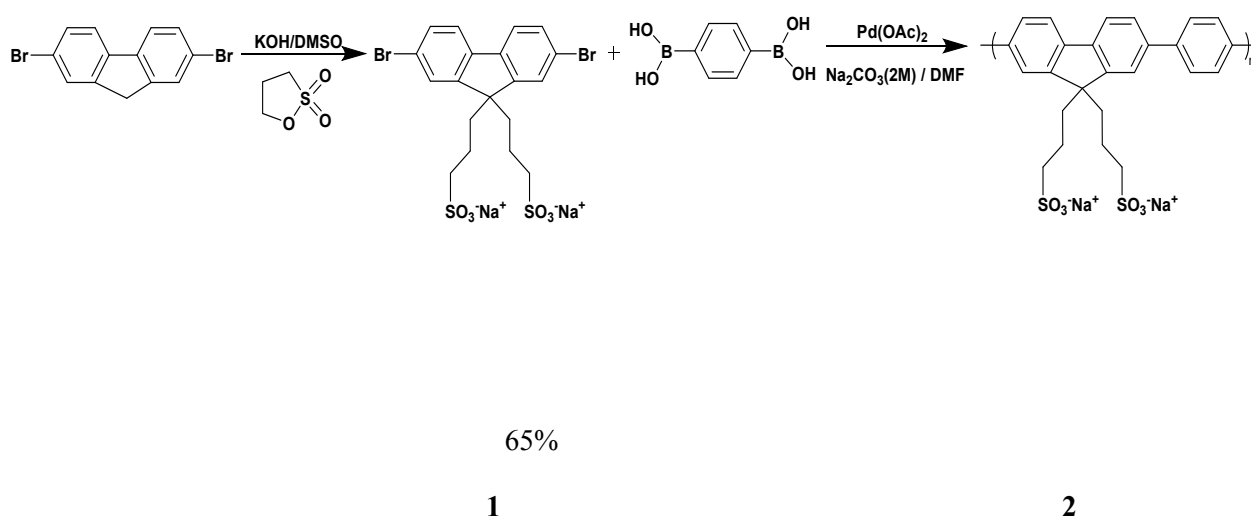

A mixture of 1 (0.5g, 0.74 mmol), Palladium(II) acetate, CAS 3375-31-3 Sigma (0.007 g, 0.03 mmol), benzene-1,4-bisboronic acid (0.123 g, 0.74 mmol), 5 mL of 2M K<sub>2</sub>CO<sub>3</sub> and DMF (10 mL) were taken in a round bottom flask with a reflux condenser. The reaction mixture was degassed thrice to remove O<sub>2</sub> by freeze-thaw cycles followed by stirring at 60 °C for 18 h under inert atmosphere. This was followed by addition of Iodo-benzene (0.03 g, 0.147 mmol) to the reaction and stirring for further 3 h. The reaction mixture was cooled, poured into methanol and stirred for 30 min. The precipitate was collected by filtration, followed by washing with methanol. Soxhlet extraction of the above precipitate by acetone for 24 h gave the desired polymer Poly(9,9-bis(3 sulphatepropyl)fluorene-alt-1,4-phenylene (2) (0.32 g, 64%), which was further purified by dialysis using 10kD cutoff filter for 3 days to yield final polymer at 40% yield.

The M<sub>n</sub> was estimated to be 5.4x10<sup>4</sup> with PDI of 1.8. <sup>1</sup>H-NMR (400 MHz, DMSO, δ ppm): 7.68 (m, broad, 10H), 2.25 (m, broad, 8H), 0.95 (m, broad, 4H).

Poly(9,9-bis(3 sulphatepropyl)fluorene (1)

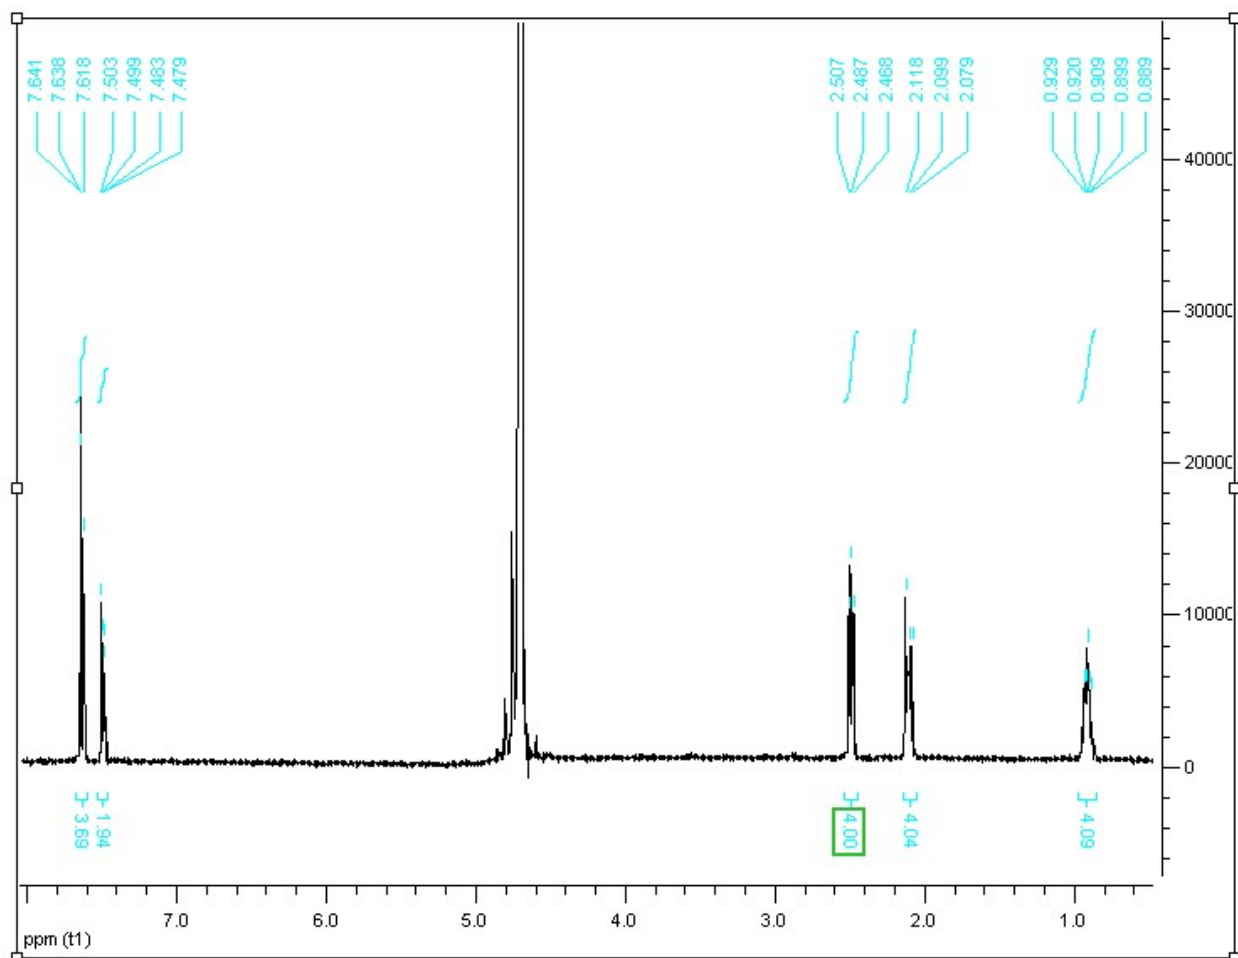

Poly(9,9-bis(3 sulphatepropyl)fluorene-alt-1,4-phenylene (2).

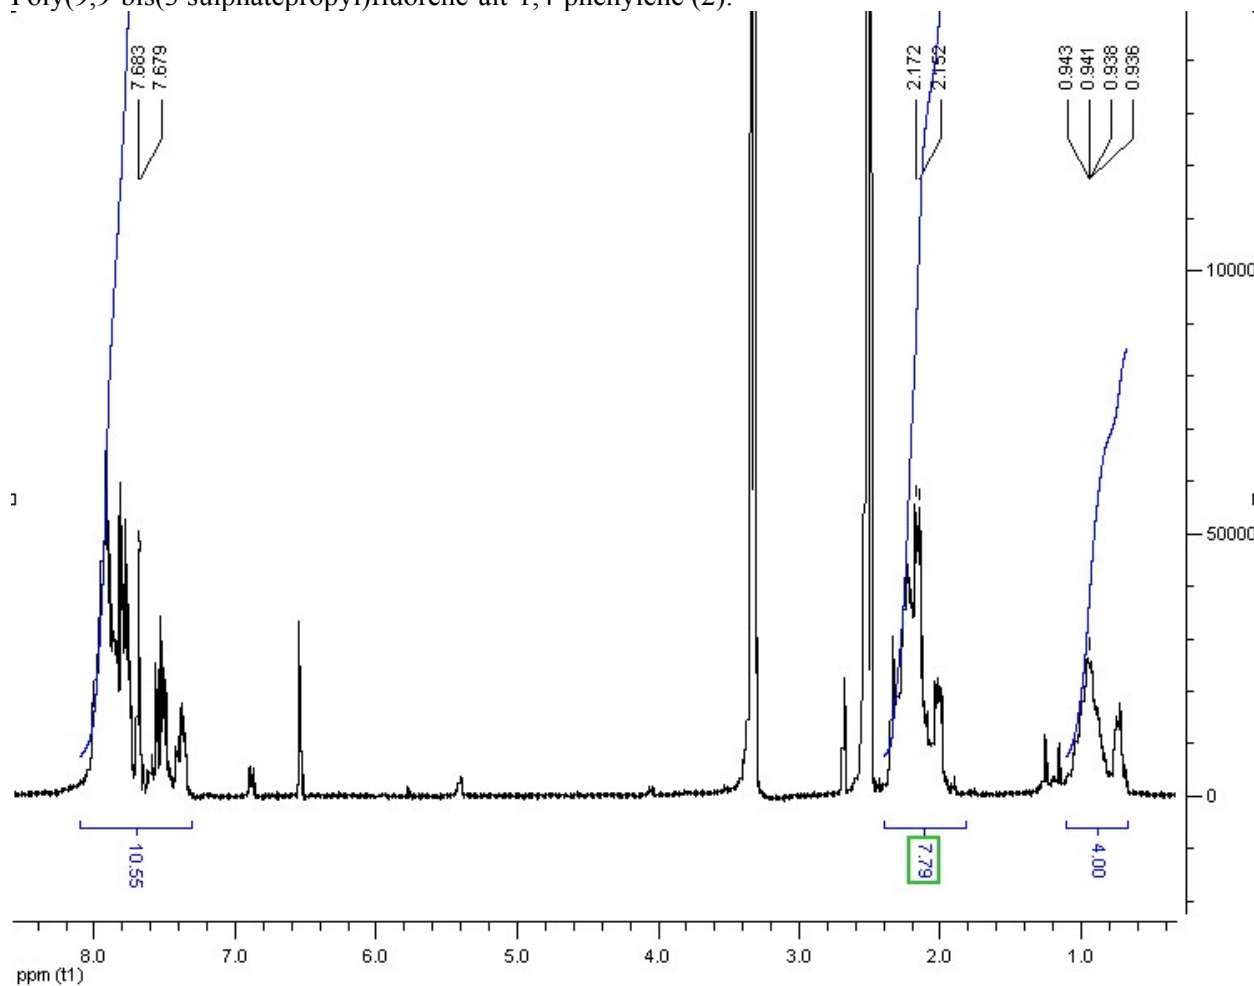

**FRET optimization.** A series of concentrations of PPE1 and PPE2 were mixed independently with a constant concentration of the donor PFS at 0.2  $\mu\text{g/ml}$  in 96 well plate. All fluorescent spectra were recorded at room temperature using Molecular Devices Spectramax M5 plate reader with an excitation wavelength of 356 nm. PPE1 and PPE2 concentrations were varied between 0.04 to 2  $\mu\text{g/ml}$  and 0.1 to 1.5  $\mu\text{g/ml}$ , respectively. For the calf serum incubation study, each condition of each polymer pair was incubated with 10  $\mu\text{L}$  of undiluted calf serum for 30 minutes. The optimized ratios of PPE1/PFS and PPE2/PFS were 1.5 and 5, respectively. To enhance the fluorescence intensity of PPE1 and PFS, we kept the same ratio for this pair but increased their concentrations to 0.75 and 0.5  $\mu\text{g/ml}$ , respectively.

**Animal models.** Mice were maintained on standard mouse chow and housed in a specific pathogen-free barrier facility with ethics approval from the University of Calgary Animal Care Committee and in accordance with Canadian Council on Animal Care guidelines. Use of the non-small cell lung cancer model harboring p53R172H $\Delta\text{g}/+$  and K-rasLA1/+ transgenes has been described earlier.<sup>3</sup> This model represents stage 1 lung cancer. Experimental Xenograft lung cancer model using H1299-EGFP-luc2 cells was previously described<sup>4</sup> and it can be used to represent stage 4 lung cancer. Following necropsy, organs were fixed in 10% formalin for an average of 24 to 48 hours. Skeletal tissue was then selected and placed into

88% formic acid for decalcification for an average of 4-6 hours. All tissue was then subject to routine processing (8-hour protocol) where tissue is sequentially placed into formalin then a series of graded alcohols (70% to 100%) followed by xylene and then paraffin wax infiltration. Tissues were then paraffin-embedded prior to sectioning and hematoxylin and eosin (H&E) staining.

**Mouse serum preparation.** Blood was collected from hearts of mice using syringes and carefully transferred to 1.5 ml Eppendorf tube. These blood-contained tubes were kept at room temperature for 45-60 minutes to induce blood clotting. After that, samples were centrifuged at 13,000 rpm for 15 min at 4° C. After centrifugation, supernatant was carefully aliquot into new Eppendorf tubes for long-term storage at -80° C. Sterile PBS (pH 7.4) was added to dilute each serum sample in the amount of 200  $\mu$ L, in order to minimize serum lost after filtration. Each diluted serum sample was filtered using a sterile 4 mm diameter syringe filter purchased from Corning®, with 0.2 $\mu$ m pore RC membrane. The total serum protein concentration was determined by bicinchoninic acid assay (BCA) and normalized by diluting to the same concentration with PBS before sensing.

**Sensing studies.** Appropriate concentration of each polymer was mixed together in PBS (pH 7.4) based on previous optimizations. Each of the PFS-PPE complexes was loaded (200  $\mu$ L) into a black 96-well untreated plate (Costar), followed by the addition of 10  $\mu$ L of 210  $\mu$ g/ml protein solution in PBS or 5 mg/ml total serum protein concentration of each mouse. The mixture was incubated for 30 minutes before their fluorescence intensities were recorded at EX/EM (nm) of 356/420, 408/480, 356/480 for PFS-PPE1 pair, and 356/420, 418/482, 356/482 for PFS-PPE2 pair. The fluorescence intensities of the sensor only (without any analyte) is  $I_0$ , while the intensities of the sensor with analytes after 30 min of incubation is  $I$ . Normalized fluorescence of each sample is  $I/I_0$ .

**Linear discriminant analysis.** The raw data matrix was processed by classical linear discriminant analysis using SYSTAT software (version 11.0, SystatSoftware, Richmond, CA, USA). In LDA, all variables were used in the model (complete mode) and the tolerance was set as 0.001. The raw fluorescence response patterns were transformed to canonical patterns where the ratio of between-class variance to the within-class variance was maximized according to the preassigned grouping. To identify the unknown samples, the normalized fluorescence intensities from unknown cases were first converted to canonical scores using the discriminant functions established on the training cases. Then, the Mahalanobis distance, the distance of a case from the centroid of a training group in the multidimensional discriminant space, was calculated for the new cases. The new case was assigned to the group with the shortest Mahalanobis distance from the case. The code for unknown analysis can be obtained from the authors.

**Receiver operating characteristic analysis (ROC).** To evaluate how well LDA predicts the unknown samples, we ran ROC analysis. We used *lda* function in *MASS* package<sup>5</sup> of R to train set 1 then use algorithm trained in set 1 to predict set 2. The ROC curve is created by plotting the true positive rate (TPR) against the false positive rate (FPR) at various threshold (cut-off level) settings using *ROCR* package. Cut-off level is the optimal threshold to maximize TPR while minimizing FPR to achieve the most effective diagnostic test. The accuracy of the test depends on how well the test separates the group being tested into those with and without cancer. Accuracy is measured by the area under the ROC curve, also known as AUC (the area under the curve). An area of 1 represents a perfect test; an area of less than 1 represents a less accurate test. AUC was obtained by the *auc* function in *pROC* package. Sensitivity and specificity were weighted equally in the prediction.

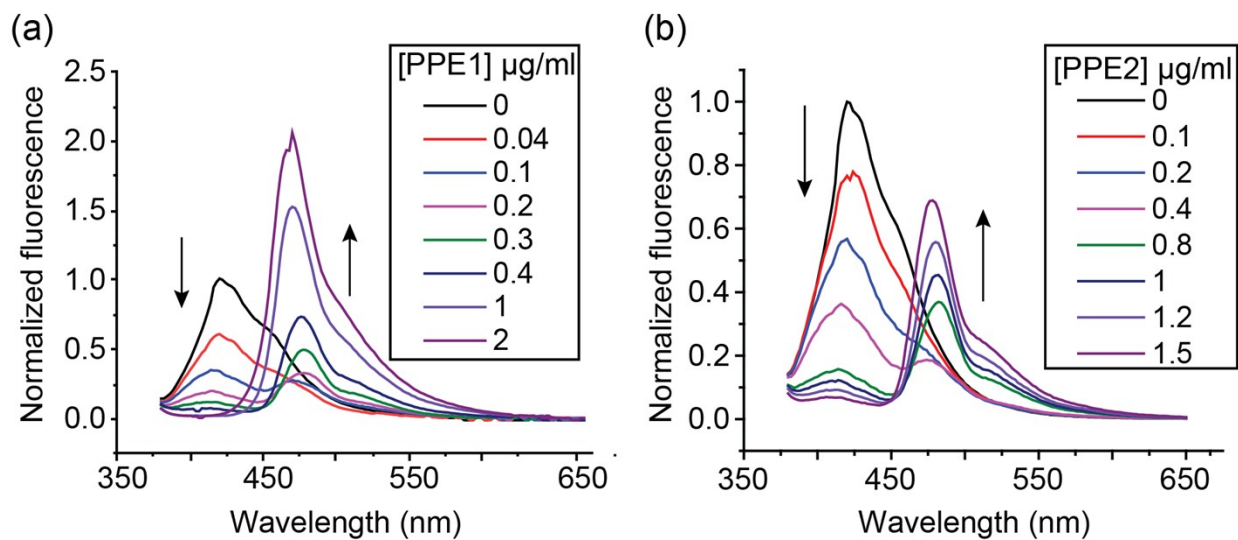

**Figure S1.** Emission spectra as a function of concentration of a) PPE1 for the PFS-PPE1 pair and b) PPE2 for the PFS-PPE2 pair. Spectra were recorded at an excitation of 356 nm in PBS at pH 7.4.

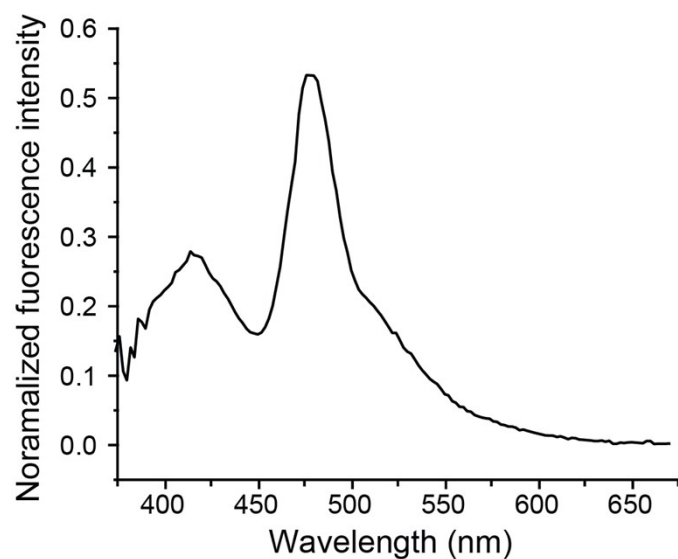

**Figure S2.** Emission spectra of PFS-PPE1 when PFS is 0.5 µg/mL and PPE1 is 0.75 µg/mL. Spectrum was recorded at an excitation of 356 nm in PBS at pH 7.4.

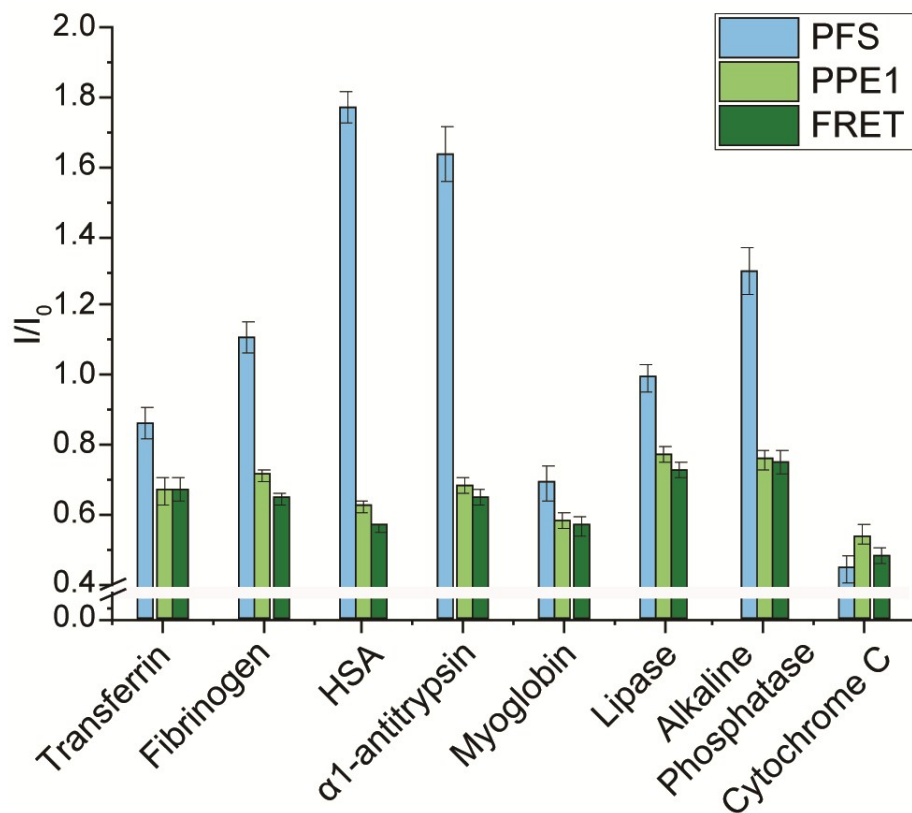

**Figure S3.** Fluorescence response from PFS-PPE1 sensor after eight protein incubation in PBS.

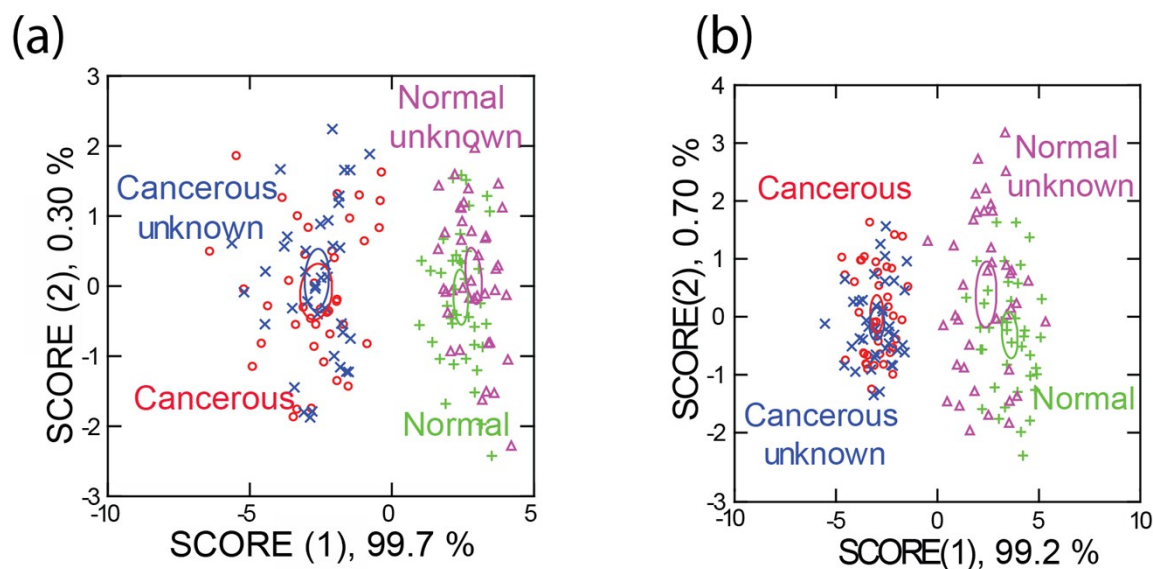

**Figure S4.** Unknown identification of serum samples from (a) experimental lung cancer model (stage 4) and (b) transgenic lung cancer model (stage 1) using PFS-PPE1 complex. The corrected unknown identification is 100% and 98.7% respectively.



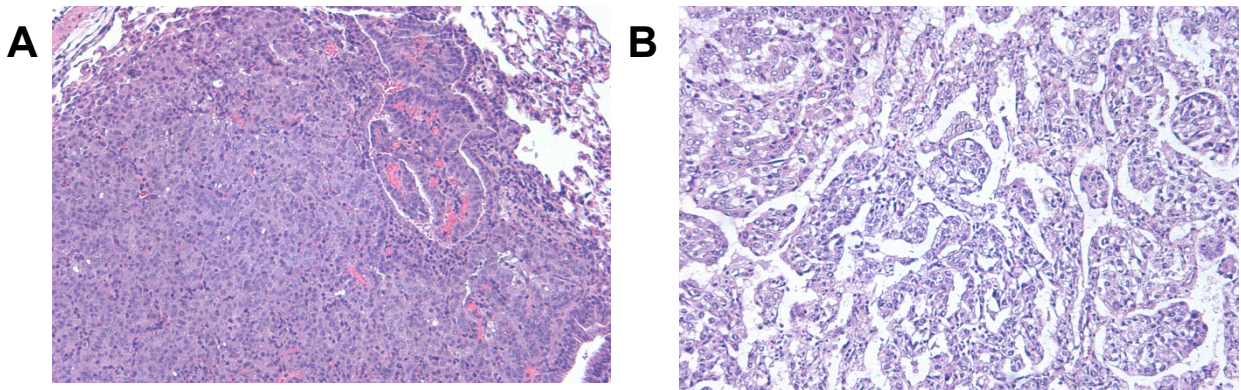

**Figure S5.** Transgenic lung cancer model. H&E staining of representative primary lung carcinoma in  $p53^{R172H\Delta g/+}$   $K-ras^{LAI/+}$  mice. (A and B) Pulmonary (lung) adenocarcinoma. Scale bar = 100x A-B.

**Table S1.** Characteristics of eight proteins in PBS.

| # | Proteins               | Charge at pH 7.4 | Isoelectric point | Molecular weight (kDa) |
|---|------------------------|------------------|-------------------|------------------------|
| 1 | Transferrin            | Neutral          | 6.1               | 80                     |
| 2 | Fibrinogen             | -                | 5.5               | 340                    |
| 3 | Human Serum Albumin    | -                | 5.2               | 69.4                   |
| 4 | $\alpha$ 1-antitrypsin | -                | 4.6               | 52                     |
| 5 | Myoglobin              | Neutral          | 7.2               | 17                     |
| 6 | Lipase                 | -                | 5.6               | 58                     |
| 7 | Alkaline Phosphatase   | -                | 5.7               | 140                    |
| 8 | Cytochrome C           | +                | 10.7              | 12.3                   |

**Table S2.** Characteristics of tumor mouse models.

| # | Model type                     | Mouse strain                                        | Cell line | Injection location | Tumor induction time (days) | # Controls | # Cancer-bearing mice |
|---|--------------------------------|-----------------------------------------------------|-----------|--------------------|-----------------------------|------------|-----------------------|
| 1 | Transgenic lung cancer model   | 129/Sv $p53^{R172H\Delta g/+}$ $K-ras^{LAI/+}$ mice | N/A       | N/A                | 100-300                     | 5          | 5                     |
| 2 | Experimental lung cancer model | NIH-III ( $nu/nu$ ; $beige/beige$ ) mice            | H1299     | Intracardiac route | 55-120                      | 5          | 5                     |

**Table S3.** Fluorescent responses obtained from 8 proteins in PBS using PFS-PPE1 sensor.

| #  | Sample ID              | PFS    | PPE1   | FRET   |
|----|------------------------|--------|--------|--------|
| 1  | Transferrin            | 0.9021 | 0.7083 | 0.6945 |
| 2  | Transferrin            | 0.8976 | 0.7388 | 0.7248 |
| 3  | Transferrin            | 0.8604 | 0.6773 | 0.6806 |
| 4  | Transferrin            | 0.7924 | 0.6437 | 0.6447 |
| 5  | Transferrin            | 0.8894 | 0.6441 | 0.6736 |
| 6  | Transferrin            | 0.8205 | 0.6299 | 0.6374 |
| 7  | Transferrin            | 0.8138 | 0.6467 | 0.6458 |
| 8  | Transferrin            | 0.9090 | 0.6609 | 0.6816 |
| 9  | Fibrinogen             | 1.1968 | 0.7470 | 0.6681 |
| 10 | Fibrinogen             | 1.1048 | 0.7335 | 0.6591 |
| 11 | Fibrinogen             | 1.1230 | 0.7175 | 0.6515 |
| 12 | Fibrinogen             | 1.0929 | 0.7004 | 0.6277 |
| 13 | Fibrinogen             | 1.1071 | 0.7228 | 0.6516 |
| 14 | Fibrinogen             | 1.1399 | 0.7002 | 0.6251 |
| 15 | Fibrinogen             | 1.0851 | 0.7018 | 0.6394 |
| 16 | Fibrinogen             | 1.0418 | 0.6990 | 0.6337 |
| 17 | Human Serum Albumin    | 1.8530 | 0.6351 | 0.5796 |
| 18 | Human Serum Albumin    | 1.8001 | 0.6336 | 0.5688 |
| 19 | Human Serum Albumin    | 1.8093 | 0.6459 | 0.5768 |
| 20 | Human Serum Albumin    | 1.7628 | 0.6168 | 0.5550 |
| 21 | Human Serum Albumin    | 1.7488 | 0.6119 | 0.5558 |
| 22 | Human Serum Albumin    | 1.7540 | 0.6278 | 0.5678 |
| 23 | Human Serum Albumin    | 1.7220 | 0.6013 | 0.5491 |
| 24 | Human Serum Albumin    | 1.7146 | 0.5982 | 0.5570 |
| 25 | $\alpha$ 1-antitrypsin | 1.7499 | 0.6933 | 0.6597 |
| 26 | $\alpha$ 1-antitrypsin | 1.6233 | 0.6631 | 0.6304 |
| 27 | $\alpha$ 1-antitrypsin | 1.6401 | 0.6732 | 0.6477 |
| 28 | $\alpha$ 1-antitrypsin | 1.6160 | 0.6870 | 0.6571 |
| 29 | $\alpha$ 1-antitrypsin | 1.5680 | 0.6522 | 0.6257 |
| 30 | $\alpha$ 1-antitrypsin | 1.7089 | 0.7382 | 0.6848 |
| 31 | $\alpha$ 1-antitrypsin | 1.4907 | 0.6744 | 0.6445 |
| 32 | $\alpha$ 1-antitrypsin | 1.6891 | 0.6769 | 0.6377 |
| 33 | Myoglobin              | 0.6603 | 0.5850 | 0.5758 |
| 34 | Myoglobin              | 0.6638 | 0.5731 | 0.5631 |
| 35 | Myoglobin              | 0.7369 | 0.6203 | 0.6069 |
| 36 | Myoglobin              | 0.6445 | 0.5439 | 0.5312 |
| 37 | Myoglobin              | 0.6470 | 0.5747 | 0.5509 |
| 38 | Myoglobin              | 0.7649 | 0.6128 | 0.5913 |
| 39 | Myoglobin              | 0.6586 | 0.5854 | 0.5692 |
| 40 | Myoglobin              | 0.7263 | 0.5595 | 0.5474 |
| 41 | Lipase                 | 1.0406 | 0.7569 | 0.7189 |
| 42 | Lipase                 | 1.0197 | 0.7312 | 0.6880 |
| 43 | Lipase                 | 1.0526 | 0.7878 | 0.7412 |
| 44 | Lipase                 | 0.9737 | 0.7615 | 0.7089 |
| 45 | Lipase                 | 1.0017 | 0.7999 | 0.7543 |
| 46 | Lipase                 | 0.9590 | 0.8022 | 0.7548 |

|    |                      |        |        |        |
|----|----------------------|--------|--------|--------|
| 47 | Lipase               | 0.9227 | 0.7777 | 0.7349 |
| 48 | Lipase               | 0.9727 | 0.7528 | 0.7144 |
| 49 | Alkaline Phosphatase | 1.2631 | 0.7332 | 0.7070 |
| 50 | Alkaline Phosphatase | 1.3532 | 0.7913 | 0.7737 |
| 51 | Alkaline Phosphatase | 1.3992 | 0.8061 | 0.7985 |
| 52 | Alkaline Phosphatase | 1.3318 | 0.7683 | 0.7585 |
| 53 | Alkaline Phosphatase | 1.3397 | 0.7726 | 0.7694 |
| 54 | Alkaline Phosphatase | 1.2483 | 0.7364 | 0.7251 |
| 55 | Alkaline Phosphatase | 1.2147 | 0.7538 | 0.7313 |
| 56 | Alkaline Phosphatase | 1.2546 | 0.7306 | 0.7116 |
| 57 | Cytochrome C         | 0.4299 | 0.5703 | 0.4979 |
| 58 | Cytochrome C         | 0.4527 | 0.5317 | 0.4850 |
| 59 | Cytochrome C         | 0.4986 | 0.5312 | 0.4546 |
| 60 | Cytochrome C         | 0.4877 | 0.5214 | 0.4822 |
| 61 | Cytochrome C         | 0.4406 | 0.5934 | 0.5306 |
| 62 | Cytochrome C         | 0.4403 | 0.5197 | 0.4769 |
| 63 | Cytochrome C         | 0.3906 | 0.5236 | 0.4754 |
| 64 | Cytochrome C         | 0.4049 | 0.5274 | 0.4737 |

**Table S4.** Identification of the blinded unknowns from 8 proteins in PBS using PFS-PPE1 sensor.

| #  | PFS    | PPE1   | FRET   | True ID             | Identified as       | Correct identification |
|----|--------|--------|--------|---------------------|---------------------|------------------------|
| 1  | 0.8454 | 0.6323 | 0.6201 | Transferrin         | Transferrin         | Yes                    |
| 2  | 0.8695 | 0.7386 | 0.7408 | Transferrin         | Transferrin         | Yes                    |
| 3  | 0.7964 | 0.6491 | 0.6518 | Transferrin         | Transferrin         | Yes                    |
| 4  | 0.7763 | 0.6817 | 0.6725 | Transferrin         | Transferrin         | Yes                    |
| 5  | 0.8920 | 0.6711 | 0.6502 | Transferrin         | Transferrin         | Yes                    |
| 6  | 0.8450 | 0.6777 | 0.6626 | Transferrin         | Transferrin         | Yes                    |
| 7  | 0.8746 | 0.7920 | 0.7785 | Transferrin         | Transferrin         | Yes                    |
| 8  | 0.9267 | 0.7137 | 0.7051 | Transferrin         | Transferrin         | Yes                    |
| 9  | 1.1369 | 0.7070 | 0.6395 | Fibrinogen          | Fibrinogen          | Yes                    |
| 10 | 1.1099 | 0.7069 | 0.6400 | Fibrinogen          | Fibrinogen          | Yes                    |
| 11 | 1.0865 | 0.7046 | 0.6367 | Fibrinogen          | Fibrinogen          | Yes                    |
| 12 | 1.1260 | 0.7327 | 0.6628 | Fibrinogen          | Fibrinogen          | Yes                    |
| 13 | 1.1922 | 0.7316 | 0.6485 | Fibrinogen          | Fibrinogen          | Yes                    |
| 14 | 1.1206 | 0.7012 | 0.6282 | Fibrinogen          | Fibrinogen          | Yes                    |
| 15 | 1.0745 | 0.6801 | 0.6114 | Fibrinogen          | Fibrinogen          | Yes                    |
| 16 | 1.0911 | 0.6933 | 0.6235 | Fibrinogen          | Fibrinogen          | Yes                    |
| 17 | 1.7292 | 0.6281 | 0.5644 | Human Serum Albumin | Human Serum Albumin | Yes                    |
| 18 | 1.7887 | 0.6314 | 0.5696 | Human Serum Albumin | Human Serum Albumin | Yes                    |
| 19 | 1.8108 | 0.6237 | 0.5600 | Human Serum Albumin | Human Serum Albumin | Yes                    |
| 20 | 1.7761 | 0.6480 | 0.5861 | Human Serum Albumin | Human Serum Albumin | Yes                    |
| 21 | 1.6951 | 0.6027 | 0.5490 | Human Serum Albumin | Human Serum Albumin | Yes                    |
| 22 | 1.7727 | 0.6277 | 0.5673 | Human Serum Albumin | Human Serum Albumin | Yes                    |

|    |        |        |        |                        |                        |     |
|----|--------|--------|--------|------------------------|------------------------|-----|
| 23 | 1.6694 | 0.5832 | 0.5252 | Human Serum Albumin    | Human Serum Albumin    | Yes |
| 24 | 1.6538 | 0.5886 | 0.5445 | Human Serum Albumin    | Human Serum Albumin    | Yes |
| 25 | 1.7191 | 0.7264 | 0.6867 | $\alpha$ 1-antitrypsin | $\alpha$ 1-antitrypsin | Yes |
| 26 | 1.5640 | 0.6695 | 0.6523 | $\alpha$ 1-antitrypsin | $\alpha$ 1-antitrypsin | Yes |
| 27 | 1.6341 | 0.7516 | 0.7185 | $\alpha$ 1-antitrypsin | $\alpha$ 1-antitrypsin | Yes |
| 28 | 1.4942 | 0.6914 | 0.6681 | $\alpha$ 1-antitrypsin | $\alpha$ 1-antitrypsin | Yes |
| 29 | 1.5323 | 0.7312 | 0.6828 | $\alpha$ 1-antitrypsin | $\alpha$ 1-antitrypsin | Yes |
| 30 | 1.4386 | 0.6498 | 0.6188 | $\alpha$ 1-antitrypsin | $\alpha$ 1-antitrypsin | Yes |
| 31 | 1.3817 | 0.6472 | 0.6117 | $\alpha$ 1-antitrypsin | $\alpha$ 1-antitrypsin | Yes |
| 32 | 1.4942 | 0.6437 | 0.6099 | $\alpha$ 1-antitrypsin | $\alpha$ 1-antitrypsin | Yes |
| 33 | 0.6951 | 0.5915 | 0.5735 | Myoglobin              | Myoglobin              | Yes |
| 34 | 0.6751 | 0.5840 | 0.5733 | Myoglobin              | Myoglobin              | Yes |
| 35 | 0.6830 | 0.5672 | 0.5616 | Myoglobin              | Myoglobin              | Yes |
| 36 | 0.6312 | 0.5622 | 0.5530 | Myoglobin              | Myoglobin              | Yes |
| 37 | 0.6368 | 0.5614 | 0.5523 | Myoglobin              | Myoglobin              | Yes |
| 38 | 0.6912 | 0.5801 | 0.5622 | Myoglobin              | Myoglobin              | Yes |
| 39 | 0.6187 | 0.5472 | 0.5481 | Myoglobin              | Myoglobin              | Yes |
| 40 | 0.6602 | 0.5644 | 0.5508 | Myoglobin              | Myoglobin              | Yes |
| 41 | 1.0026 | 0.7456 | 0.7080 | Lipase                 | Lipase                 | Yes |
| 42 | 1.0122 | 0.7739 | 0.7354 | Lipase                 | Lipase                 | Yes |
| 43 | 0.9857 | 0.7976 | 0.7546 | Lipase                 | Lipase                 | Yes |
| 44 | 0.9546 | 0.7949 | 0.7558 | Lipase                 | Lipase                 | Yes |
| 45 | 0.9107 | 0.7769 | 0.7242 | Lipase                 | Lipase                 | Yes |
| 46 | 0.9460 | 0.8108 | 0.7503 | Lipase                 | Lipase                 | Yes |
| 47 | 0.9213 | 0.7906 | 0.7526 | Lipase                 | Lipase                 | Yes |
| 48 | 0.9671 | 0.7761 | 0.7741 | Lipase                 | Transferrin            | No  |
| 49 | 1.2502 | 0.7770 | 0.7530 | Alkaline Phosphatase   | Alkaline Phosphatase   | Yes |
| 50 | 1.3511 | 0.8061 | 0.7741 | Alkaline Phosphatase   | Alkaline Phosphatase   | Yes |
| 51 | 1.4481 | 0.8268 | 0.8173 | Alkaline Phosphatase   | Alkaline Phosphatase   | Yes |
| 52 | 1.3221 | 0.7869 | 0.7617 | Alkaline Phosphatase   | Alkaline Phosphatase   | Yes |
| 53 | 1.3853 | 0.7913 | 0.7756 | Alkaline Phosphatase   | Alkaline Phosphatase   | Yes |
| 54 | 1.3408 | 0.7645 | 0.7741 | Alkaline Phosphatase   | Alkaline Phosphatase   | Yes |
| 55 | 1.3960 | 0.7937 | 0.7776 | Alkaline Phosphatase   | Alkaline Phosphatase   | Yes |
| 56 | 1.3342 | 0.7416 | 0.7193 | Alkaline Phosphatase   | Alkaline Phosphatase   | Yes |
| 57 | 0.4389 | 0.5595 | 0.5069 | Cytochrome C           | Cytochrome C           | Yes |
| 58 | 0.4691 | 0.5494 | 0.4931 | Cytochrome C           | Cytochrome C           | Yes |
| 59 | 0.4302 | 0.5254 | 0.4590 | Cytochrome C           | Cytochrome C           | Yes |
| 60 | 0.4458 | 0.5317 | 0.4822 | Cytochrome C           | Cytochrome C           | Yes |
| 61 | 0.3878 | 0.5342 | 0.4607 | Cytochrome C           | Cytochrome C           | Yes |
| 62 | 0.4305 | 0.5127 | 0.4366 | Cytochrome C           | Cytochrome C           | Yes |
| 63 | 0.4713 | 0.5905 | 0.5079 | Cytochrome C           | Cytochrome C           | Yes |

|    |        |        |        |              |              |     |
|----|--------|--------|--------|--------------|--------------|-----|
| 64 | 0.4113 | 0.5256 | 0.4657 | Cytochrome C | Cytochrome C | Yes |
|----|--------|--------|--------|--------------|--------------|-----|

**Table S5.** Fluorescent responses obtained from 8 proteins in PBS using PFS-PPE2 sensor.

| #  | Sample ID              | PFS    | PPE2   | FRET   |
|----|------------------------|--------|--------|--------|
| 1  | Transferrin            | 0.5241 | 0.6237 | 0.5757 |
| 2  | Transferrin            | 0.5333 | 0.5847 | 0.5614 |
| 3  | Transferrin            | 0.5657 | 0.6593 | 0.6165 |
| 4  | Transferrin            | 0.5032 | 0.5699 | 0.5410 |
| 5  | Transferrin            | 0.5169 | 0.5939 | 0.5513 |
| 6  | Transferrin            | 0.5657 | 0.6405 | 0.5858 |
| 7  | Transferrin            | 0.4776 | 0.5561 | 0.5373 |
| 8  | Transferrin            | 0.5404 | 0.6120 | 0.5700 |
| 9  | Fibrinogen             | 0.7972 | 0.6989 | 0.6227 |
| 10 | Fibrinogen             | 0.8286 | 0.7581 | 0.6605 |
| 11 | Fibrinogen             | 0.9205 | 0.7219 | 0.6495 |
| 12 | Fibrinogen             | 0.7983 | 0.6917 | 0.5966 |
| 13 | Fibrinogen             | 0.8277 | 0.6815 | 0.6068 |
| 14 | Fibrinogen             | 0.7978 | 0.6632 | 0.5801 |
| 15 | Fibrinogen             | 0.8153 | 0.7011 | 0.6137 |
| 16 | Fibrinogen             | 0.7874 | 0.6668 | 0.5822 |
| 17 | Human Serum Albumin    | 1.1162 | 0.6112 | 0.5335 |
| 18 | Human Serum Albumin    | 1.0669 | 0.5848 | 0.5183 |
| 19 | Human Serum Albumin    | 1.0437 | 0.6034 | 0.5339 |
| 20 | Human Serum Albumin    | 1.0407 | 0.5774 | 0.5155 |
| 21 | Human Serum Albumin    | 1.0190 | 0.5691 | 0.5037 |
| 22 | Human Serum Albumin    | 1.0327 | 0.5803 | 0.5097 |
| 23 | Human Serum Albumin    | 1.0508 | 0.5677 | 0.5065 |
| 24 | Human Serum Albumin    | 1.0302 | 0.5697 | 0.5028 |
| 25 | $\alpha$ 1-antitrypsin | 1.0768 | 0.6551 | 0.5760 |
| 26 | $\alpha$ 1-antitrypsin | 1.0679 | 0.6388 | 0.5682 |
| 27 | $\alpha$ 1-antitrypsin | 1.0702 | 0.6699 | 0.5908 |
| 28 | $\alpha$ 1-antitrypsin | 0.9962 | 0.6227 | 0.5666 |
| 29 | $\alpha$ 1-antitrypsin | 1.0026 | 0.6554 | 0.5751 |
| 30 | $\alpha$ 1-antitrypsin | 0.9430 | 0.6669 | 0.5803 |
| 31 | $\alpha$ 1-antitrypsin | 0.9587 | 0.6415 | 0.5470 |
| 32 | $\alpha$ 1-antitrypsin | 1.0708 | 0.6853 | 0.5988 |
| 33 | Myoglobin              | 0.2761 | 0.5321 | 0.4951 |
| 34 | Myoglobin              | 0.3690 | 0.5419 | 0.5061 |
| 35 | Myoglobin              | 0.2955 | 0.5151 | 0.4917 |
| 36 | Myoglobin              | 0.2927 | 0.5284 | 0.4724 |
| 37 | Myoglobin              | 0.2784 | 0.5350 | 0.4851 |
| 38 | Myoglobin              | 0.2867 | 0.5277 | 0.4734 |
| 39 | Myoglobin              | 0.3198 | 0.5078 | 0.4678 |
| 40 | Myoglobin              | 0.3998 | 0.5254 | 0.4847 |
| 41 | Lipase                 | 0.7648 | 0.8161 | 0.6565 |
| 42 | Lipase                 | 0.6974 | 0.7072 | 0.6231 |
| 43 | Lipase                 | 0.6702 | 0.7603 | 0.6883 |
| 44 | Lipase                 | 0.6846 | 0.7907 | 0.6786 |

|    |                      |        |        |        |
|----|----------------------|--------|--------|--------|
| 45 | Lipase               | 0.7120 | 0.7610 | 0.6622 |
| 46 | Lipase               | 0.6094 | 0.7644 | 0.6817 |
| 47 | Lipase               | 0.6213 | 0.7446 | 0.6546 |
| 48 | Lipase               | 0.6192 | 0.7621 | 0.6672 |
| 49 | Alkaline Phosphatase | 0.9172 | 0.7804 | 0.7191 |
| 50 | Alkaline Phosphatase | 0.9413 | 0.7936 | 0.7254 |
| 51 | Alkaline Phosphatase | 0.9116 | 0.8031 | 0.7324 |
| 52 | Alkaline Phosphatase | 0.8981 | 0.7589 | 0.7038 |
| 53 | Alkaline Phosphatase | 0.9306 | 0.7764 | 0.7158 |
| 54 | Alkaline Phosphatase | 0.9011 | 0.7759 | 0.7090 |
| 55 | Alkaline Phosphatase | 0.9195 | 0.7613 | 0.7156 |
| 56 | Alkaline Phosphatase | 0.9208 | 0.7817 | 0.7073 |
| 57 | Cytochrome C         | 0.3132 | 0.4750 | 0.4269 |
| 58 | Cytochrome C         | 0.2136 | 0.4877 | 0.4366 |
| 59 | Cytochrome C         | 0.2342 | 0.4996 | 0.4353 |
| 60 | Cytochrome C         | 0.2186 | 0.4877 | 0.4270 |
| 61 | Cytochrome C         | 0.2029 | 0.4788 | 0.4194 |
| 62 | Cytochrome C         | 0.2087 | 0.4874 | 0.4201 |
| 63 | Cytochrome C         | 0.2126 | 0.4717 | 0.4152 |
| 64 | Cytochrome C         | 0.2193 | 0.4660 | 0.4046 |

**Table S6.** Identification of the blinded unknowns from 8 proteins in PBS using PFS-PPE2 sensor.

| #  | PFS    | PPE2   | FRET   | True ID             | Identified as          | Correct identification |
|----|--------|--------|--------|---------------------|------------------------|------------------------|
| 1  | 0.5745 | 0.6076 | 0.5726 | Transferrin         | Transferrin            | Yes                    |
| 2  | 0.5044 | 0.6453 | 0.5832 | Transferrin         | Transferrin            | Yes                    |
| 3  | 0.4876 | 0.5858 | 0.5530 | Transferrin         | Transferrin            | Yes                    |
| 4  | 0.5285 | 0.5697 | 0.5587 | Transferrin         | Transferrin            | Yes                    |
| 5  | 0.5908 | 0.6969 | 0.6605 | Transferrin         | Lipase                 | No                     |
| 6  | 0.7921 | 0.8338 | 0.7762 | Transferrin         | Alkaline Phosphatase   | No                     |
| 7  | 0.4915 | 0.5702 | 0.5535 | Transferrin         | Transferrin            | Yes                    |
| 8  | 0.5677 | 0.7940 | 0.7086 | Transferrin         | Lipase                 | No                     |
| 9  | 0.7799 | 0.6628 | 0.5962 | Fibrinogen          | Fibrinogen             | Yes                    |
| 10 | 0.8289 | 0.6788 | 0.6226 | Fibrinogen          | Fibrinogen             | Yes                    |
| 11 | 0.8827 | 0.7173 | 0.6484 | Fibrinogen          | Fibrinogen             | Yes                    |
| 12 | 0.7937 | 0.6817 | 0.6009 | Fibrinogen          | Fibrinogen             | Yes                    |
| 13 | 0.8313 | 0.6682 | 0.6171 | Fibrinogen          | Fibrinogen             | Yes                    |
| 14 | 0.8212 | 0.6781 | 0.6007 | Fibrinogen          | Fibrinogen             | Yes                    |
| 15 | 0.8295 | 0.7221 | 0.6301 | Fibrinogen          | Fibrinogen             | Yes                    |
| 16 | 0.7620 | 0.6366 | 0.5780 | Fibrinogen          | Fibrinogen             | Yes                    |
| 17 | 1.0946 | 0.6282 | 0.5645 | Human Serum Albumin | Human Serum Albumin    | Yes                    |
| 18 | 1.0716 | 0.5820 | 0.5217 | Human Serum Albumin | Human Serum Albumin    | Yes                    |
| 19 | 1.0658 | 0.5666 | 0.5352 | Human Serum Albumin | Human Serum Albumin    | Yes                    |
| 20 | 1.0213 | 0.5699 | 0.5025 | Human Serum Albumin | Human Serum Albumin    | Yes                    |
| 21 | 1.1406 | 0.6553 | 0.5896 | Human Serum Albumin | $\alpha$ 1-antitrypsin | No                     |

|    |        |        |        |                        |                        |     |
|----|--------|--------|--------|------------------------|------------------------|-----|
| 22 | 1.0400 | 0.5626 | 0.5206 | Human Serum Albumin    | Human Serum Albumin    | Yes |
| 23 | 1.0167 | 0.5605 | 0.5018 | Human Serum Albumin    | Human Serum Albumin    | Yes |
| 24 | 1.0033 | 0.5582 | 0.5039 | Human Serum Albumin    | Human Serum Albumin    | Yes |
| 25 | 1.0456 | 0.6747 | 0.6081 | $\alpha$ 1-antitrypsin | $\alpha$ 1-antitrypsin | Yes |
| 26 | 1.0378 | 0.6571 | 0.5909 | $\alpha$ 1-antitrypsin | $\alpha$ 1-antitrypsin | Yes |
| 27 | 1.0408 | 0.6597 | 0.6049 | $\alpha$ 1-antitrypsin | $\alpha$ 1-antitrypsin | Yes |
| 28 | 0.9922 | 0.6500 | 0.5749 | $\alpha$ 1-antitrypsin | $\alpha$ 1-antitrypsin | Yes |
| 29 | 0.9530 | 0.6934 | 0.6239 | $\alpha$ 1-antitrypsin | Fibrinogen             | No  |
| 30 | 0.9900 | 0.7720 | 0.6846 | $\alpha$ 1-antitrypsin | Alkaline Phosphatase   | No  |
| 31 | 0.9140 | 0.6347 | 0.5661 | $\alpha$ 1-antitrypsin | $\alpha$ 1-antitrypsin | Yes |
| 32 | 0.9182 | 0.6404 | 0.5734 | $\alpha$ 1-antitrypsin | $\alpha$ 1-antitrypsin | Yes |
| 33 | 0.2720 | 0.5271 | 0.4918 | Myoglobin              | Myoglobin              | Yes |
| 34 | 0.2920 | 0.5376 | 0.5031 | Myoglobin              | Myoglobin              | Yes |
| 35 | 0.3159 | 0.5415 | 0.4890 | Myoglobin              | Myoglobin              | Yes |
| 36 | 0.2897 | 0.5298 | 0.4762 | Myoglobin              | Myoglobin              | Yes |
| 37 | 0.2939 | 0.5104 | 0.4706 | Myoglobin              | Myoglobin              | Yes |
| 38 | 0.3203 | 0.5470 | 0.5054 | Myoglobin              | Myoglobin              | Yes |
| 39 | 0.3207 | 0.5006 | 0.4601 | Myoglobin              | Myoglobin              | Yes |
| 40 | 0.4911 | 0.5502 | 0.4785 | Myoglobin              | Myoglobin              | Yes |
| 41 | 0.6755 | 0.7398 | 0.6587 | Lipase                 | Lipase                 | Yes |
| 42 | 0.6813 | 0.7451 | 0.6589 | Lipase                 | Lipase                 | Yes |
| 43 | 0.6807 | 0.7872 | 0.6911 | Lipase                 | Lipase                 | Yes |
| 44 | 0.6794 | 0.7903 | 0.6805 | Lipase                 | Lipase                 | Yes |
| 45 | 0.6422 | 0.8116 | 0.7106 | Lipase                 | Lipase                 | Yes |
| 46 | 0.6485 | 0.8252 | 0.7269 | Lipase                 | Lipase                 | Yes |
| 47 | 0.5584 | 0.9977 | 0.6776 | Lipase                 | Lipase                 | Yes |
| 48 | 0.6197 | 0.7562 | 0.6630 | Lipase                 | Transferrin            | Yes |
| 49 | 0.8721 | 0.7608 | 0.7053 | Alkaline Phosphatase   | Alkaline Phosphatase   | Yes |
| 50 | 0.9368 | 0.8005 | 0.7527 | Alkaline Phosphatase   | Alkaline Phosphatase   | Yes |
| 51 | 0.9305 | 0.7815 | 0.7362 | Alkaline Phosphatase   | Alkaline Phosphatase   | Yes |
| 52 | 0.9301 | 0.7905 | 0.7291 | Alkaline Phosphatase   | Alkaline Phosphatase   | Yes |
| 53 | 0.8953 | 0.7925 | 0.7211 | Alkaline Phosphatase   | Alkaline Phosphatase   | Yes |
| 54 | 0.8981 | 0.7538 | 0.7181 | Alkaline Phosphatase   | Alkaline Phosphatase   | Yes |
| 55 | 0.9577 | 0.7553 | 0.6996 | Alkaline Phosphatase   | Alkaline Phosphatase   | Yes |
| 56 | 0.9293 | 0.7670 | 0.7112 | Alkaline Phosphatase   | Alkaline Phosphatase   | Yes |
| 57 | 0.3941 | 0.4822 | 0.4390 | Cytochrome C           | Myoglobin              | No  |
| 58 | 0.2095 | 0.4775 | 0.4324 | Cytochrome C           | Cytochrome C           | Yes |
| 59 | 0.2249 | 0.4977 | 0.4297 | Cytochrome C           | Cytochrome C           | Yes |
| 60 | 0.2052 | 0.4702 | 0.4187 | Cytochrome C           | Cytochrome C           | Yes |
| 61 | 0.1995 | 0.4933 | 0.4226 | Cytochrome C           | Cytochrome C           | Yes |

|    |        |        |        |              |              |     |
|----|--------|--------|--------|--------------|--------------|-----|
| 62 | 0.2066 | 0.4974 | 0.4208 | Cytochrome C | Cytochrome C | Yes |
| 63 | 0.2079 | 0.4599 | 0.4049 | Cytochrome C | Cytochrome C | Yes |
| 64 | 0.2246 | 0.4751 | 0.4125 | Cytochrome C | Cytochrome C | Yes |

**Table S7.** Fluorescent responses obtained from different concentrations of normal and cancerous mouse serum of transgenic lung model using PFS-PPE1 sensor.

| #  | Sample ID         | PFS     | PPE1   | FRET   |
|----|-------------------|---------|--------|--------|
| 1  | Cancerous 1mg/ml  | 4.5102  | 0.6913 | 0.6515 |
| 2  | Cancerous 1mg/ml  | 4.4750  | 0.6980 | 0.6519 |
| 3  | Cancerous 1mg/ml  | 4.4977  | 0.6802 | 0.6413 |
| 4  | Cancerous 1mg/ml  | 4.2100  | 0.6986 | 0.6506 |
| 5  | Cancerous 1mg/ml  | 4.5877  | 0.6678 | 0.6250 |
| 6  | Cancerous 1mg/ml  | 4.4425  | 0.6635 | 0.6266 |
| 7  | Cancerous 1mg/ml  | 4.1351  | 0.6649 | 0.6174 |
| 8  | Cancerous 1mg/ml  | 4.3998  | 0.5702 | 0.5455 |
| 9  | Control 1mg/ml    | 5.7985  | 0.6707 | 0.6227 |
| 10 | Control 1mg/ml    | 5.4608  | 0.6964 | 0.6490 |
| 11 | Control 1mg/ml    | 5.3317  | 0.6992 | 0.6498 |
| 12 | Control 1mg/ml    | 5.2492  | 0.6742 | 0.6339 |
| 13 | Control 1mg/ml    | 5.4961  | 0.6855 | 0.6363 |
| 14 | Control 1mg/ml    | 5.2462  | 0.6759 | 0.6290 |
| 15 | Control 1mg/ml    | 5.1953  | 0.6710 | 0.6211 |
| 16 | Control 1mg/ml    | 5.2572  | 0.6081 | 0.5750 |
| 17 | Cancerous 5mg/ml  | 7.2700  | 0.7650 | 0.6644 |
| 18 | Cancerous 5mg/ml  | 7.3320  | 0.7635 | 0.6634 |
| 19 | Cancerous 5mg/ml  | 7.3308  | 0.7368 | 0.6457 |
| 20 | Cancerous 5mg/ml  | 7.0432  | 0.7410 | 0.6507 |
| 21 | Cancerous 5mg/ml  | 7.0158  | 0.7159 | 0.6272 |
| 22 | Cancerous 5mg/ml  | 6.9180  | 0.7167 | 0.6268 |
| 23 | Cancerous 5mg/ml  | 7.0933  | 0.6965 | 0.6117 |
| 24 | Cancerous 5mg/ml  | 6.8972  | 0.6899 | 0.6037 |
| 25 | Control 5mg/ml    | 8.6816  | 0.7406 | 0.6549 |
| 26 | Control 5mg/ml    | 8.6680  | 0.7515 | 0.6631 |
| 27 | Control 5mg/ml    | 8.9174  | 0.7511 | 0.6561 |
| 28 | Control 5mg/ml    | 8.3522  | 0.7348 | 0.6386 |
| 29 | Control 5mg/ml    | 8.4176  | 0.7330 | 0.6374 |
| 30 | Control 5mg/ml    | 8.2908  | 0.7177 | 0.6264 |
| 31 | Control 5mg/ml    | 8.3333  | 0.7090 | 0.6221 |
| 32 | Control 5mg/ml    | 8.3223  | 0.6994 | 0.6165 |
| 33 | Cancerous 10mg/ml | 9.0372  | 0.7943 | 0.6773 |
| 34 | Cancerous 10mg/ml | 9.2855  | 0.7891 | 0.6860 |
| 35 | Cancerous 10mg/ml | 9.0921  | 0.7884 | 0.6746 |
| 36 | Cancerous 10mg/ml | 8.9689  | 0.7769 | 0.6642 |
| 37 | Cancerous 10mg/ml | 8.5911  | 0.7578 | 0.6468 |
| 38 | Cancerous 10mg/ml | 8.5122  | 0.7477 | 0.6393 |
| 39 | Cancerous 10mg/ml | 8.7232  | 0.7542 | 0.6450 |
| 40 | Cancerous 10mg/ml | 8.6444  | 0.7374 | 0.6303 |
| 41 | Control 10mg/ml   | 10.5117 | 0.7709 | 0.6744 |



|    |                   |         |        |        |
|----|-------------------|---------|--------|--------|
| 42 | Control 10mg/ml   | 10.5638 | 0.7814 | 0.6782 |
| 43 | Control 10mg/ml   | 10.6303 | 0.7853 | 0.6792 |
| 44 | Control 10mg/ml   | 10.3810 | 0.7650 | 0.6621 |
| 45 | Control 10mg/ml   | 10.3217 | 0.7579 | 0.6536 |
| 46 | Control 10mg/ml   | 10.0415 | 0.7615 | 0.6539 |
| 47 | Control 10mg/ml   | 9.8823  | 0.7413 | 0.6490 |
| 48 | Control 10mg/ml   | 9.8800  | 0.7138 | 0.6193 |
| 49 | Cancerous 20mg/ml | 10.8897 | 0.8322 | 0.7034 |
| 50 | Cancerous 20mg/ml | 10.7987 | 0.8418 | 0.7146 |
| 51 | Cancerous 20mg/ml | 10.5959 | 0.8305 | 0.6900 |
| 52 | Cancerous 20mg/ml | 10.6077 | 0.8316 | 0.6975 |
| 53 | Cancerous 20mg/ml | 10.3405 | 0.8024 | 0.6762 |
| 54 | Cancerous 20mg/ml | 10.2156 | 0.8132 | 0.6791 |
| 55 | Cancerous 20mg/ml | 10.4157 | 0.7991 | 0.6653 |
| 56 | Cancerous 20mg/ml | 10.3470 | 0.7729 | 0.6558 |
| 57 | Control 20mg/ml   | 11.5951 | 0.7936 | 0.6924 |
| 58 | Control 20mg/ml   | 12.1010 | 0.8022 | 0.7026 |
| 59 | Control 20mg/ml   | 11.6161 | 0.7759 | 0.6724 |
| 60 | Control 20mg/ml   | 11.4414 | 0.7851 | 0.6889 |
| 61 | Control 20mg/ml   | 11.3069 | 0.7671 | 0.6675 |
| 62 | Control 20mg/ml   | 11.3366 | 0.7767 | 0.6725 |
| 63 | Control 20mg/ml   | 11.3001 | 0.7647 | 0.6681 |
| 64 | Control 20mg/ml   | 11.0834 | 0.7207 | 0.6399 |

**Table S8.** Identification of the blinded unknowns from different concentrations of normal and cancerous mouse serum of transgenic lung model using PFS-PPE1 sensor.

| #  | PFS    | PPE1   | FRET   | True ID          | Identified as    | Correct identification |
|----|--------|--------|--------|------------------|------------------|------------------------|
| 1  | 4.3854 | 0.6599 | 0.6194 | Cancerous 1mg/ml | Cancerous 1mg/ml | Yes                    |
| 2  | 4.2656 | 0.6996 | 0.6462 | Cancerous 1mg/ml | Cancerous 1mg/ml | Yes                    |
| 3  | 4.1912 | 0.6997 | 0.6557 | Cancerous 1mg/ml | Cancerous 1mg/ml | Yes                    |
| 4  | 4.2441 | 0.6874 | 0.6457 | Cancerous 1mg/ml | Cancerous 1mg/ml | Yes                    |
| 5  | 4.2375 | 0.6662 | 0.6248 | Cancerous 1mg/ml | Cancerous 1mg/ml | Yes                    |
| 6  | 4.5221 | 0.6417 | 0.5993 | Cancerous 1mg/ml | Cancerous 1mg/ml | Yes                    |
| 7  | 4.1973 | 0.6641 | 0.6235 | Cancerous 1mg/ml | Cancerous 1mg/ml | Yes                    |
| 8  | 4.5145 | 0.6382 | 0.5893 | Cancerous 1mg/ml | Control 1mg/ml   | No                     |
| 9  | 5.3871 | 0.6714 | 0.6251 | Control 1mg/ml   | Control 1mg/ml   | Yes                    |
| 10 | 5.1701 | 0.6919 | 0.6315 | Control 1mg/ml   | Control 1mg/ml   | Yes                    |
| 11 | 5.2327 | 0.6977 | 0.6438 | Control 1mg/ml   | Control 1mg/ml   | Yes                    |

|    |        |        |        |                      |                      |     |
|----|--------|--------|--------|----------------------|----------------------|-----|
| 12 | 5.1061 | 0.6809 | 0.6252 | Control<br>1mg/ml    | Control<br>1mg/ml    | Yes |
| 13 | 5.0747 | 0.6705 | 0.6217 | Control<br>1mg/ml    | Control<br>1mg/ml    | Yes |
| 14 | 5.1560 | 0.6581 | 0.6131 | Control<br>1mg/ml    | Control<br>1mg/ml    | Yes |
| 15 | 5.1269 | 0.6577 | 0.6085 | Control<br>1mg/ml    | Control<br>1mg/ml    | Yes |
| 16 | 5.2236 | 0.6365 | 0.5973 | Control<br>1mg/ml    | Control<br>1mg/ml    | Yes |
| 17 | 7.3523 | 0.7485 | 0.6475 | Cancerous<br>5mg/ml  | Cancerous<br>5mg/ml  | Yes |
| 18 | 7.1799 | 0.7392 | 0.6300 | Cancerous<br>5mg/ml  | Cancerous<br>5mg/ml  | Yes |
| 19 | 7.0995 | 0.7391 | 0.6396 | Cancerous<br>5mg/ml  | Cancerous<br>5mg/ml  | Yes |
| 20 | 7.1375 | 0.7287 | 0.6340 | Cancerous<br>5mg/ml  | Cancerous<br>5mg/ml  | Yes |
| 21 | 7.0448 | 0.7061 | 0.6074 | Cancerous<br>5mg/ml  | Cancerous<br>5mg/ml  | Yes |
| 22 | 6.8809 | 0.6900 | 0.6020 | Cancerous<br>5mg/ml  | Cancerous<br>5mg/ml  | Yes |
| 23 | 6.9502 | 0.6912 | 0.5990 | Cancerous<br>5mg/ml  | Cancerous<br>5mg/ml  | Yes |
| 24 | 6.7821 | 0.6872 | 0.5932 | Cancerous<br>5mg/ml  | Cancerous<br>5mg/ml  | Yes |
| 25 | 8.3439 | 0.7452 | 0.6445 | Control<br>5mg/ml    | Control<br>5mg/ml    | Yes |
| 26 | 8.1658 | 0.7212 | 0.6281 | Control<br>5mg/ml    | Control<br>5mg/ml    | Yes |
| 27 | 8.2679 | 0.7355 | 0.6399 | Control<br>5mg/ml    | Control<br>5mg/ml    | Yes |
| 28 | 8.1488 | 0.7268 | 0.6307 | Control<br>5mg/ml    | Control<br>5mg/ml    | Yes |
| 29 | 8.1058 | 0.7086 | 0.6162 | Control<br>5mg/ml    | Control<br>5mg/ml    | Yes |
| 30 | 8.0372 | 0.7049 | 0.6148 | Control<br>5mg/ml    | Control<br>5mg/ml    | Yes |
| 31 | 7.8728 | 0.6896 | 0.5966 | Control<br>5mg/ml    | Control<br>5mg/ml    | Yes |
| 32 | 7.7990 | 0.6861 | 0.5887 | Control<br>5mg/ml    | Control<br>5mg/ml    | Yes |
| 33 | 8.8051 | 0.7810 | 0.6674 | Cancerous<br>10mg/ml | Cancerous<br>10mg/ml | Yes |
| 34 | 8.8256 | 0.7749 | 0.6584 | Cancerous<br>10mg/ml | Cancerous<br>10mg/ml | Yes |
| 35 | 8.5445 | 0.7677 | 0.6494 | Cancerous<br>10mg/ml | Cancerous<br>10mg/ml | Yes |
| 36 | 8.5324 | 0.7509 | 0.6420 | Cancerous<br>10mg/ml | Cancerous<br>10mg/ml | Yes |
| 37 | 8.3556 | 0.7400 | 0.6309 | Cancerous<br>10mg/ml | Cancerous<br>10mg/ml | Yes |
| 38 | 8.2562 | 0.7270 | 0.6197 | Cancerous<br>10mg/ml | Cancerous<br>10mg/ml | Yes |
| 39 | 8.2390 | 0.7336 | 0.6191 | Cancerous            | Cancerous            | Yes |

|    |         |        |        |                      |                      |     |
|----|---------|--------|--------|----------------------|----------------------|-----|
|    |         |        |        | 10mg/ml              | 10mg/ml              |     |
| 40 | 8.2281  | 0.7066 | 0.6004 | Cancerous<br>10mg/ml | Cancerous<br>10mg/ml | Yes |
| 41 | 10.0837 | 0.7673 | 0.6658 | Control<br>10mg/ml   | Control<br>10mg/ml   | Yes |
| 42 | 9.9277  | 0.7513 | 0.6524 | Control<br>10mg/ml   | Control<br>10mg/ml   | Yes |
| 43 | 9.7407  | 0.7659 | 0.6611 | Control<br>10mg/ml   | Control<br>10mg/ml   | Yes |
| 44 | 9.9238  | 0.7422 | 0.6444 | Control<br>10mg/ml   | Control<br>10mg/ml   | Yes |
| 45 | 9.5966  | 0.7321 | 0.6289 | Control<br>10mg/ml   | Control<br>10mg/ml   | Yes |
| 46 | 9.4134  | 0.7287 | 0.6276 | Control<br>10mg/ml   | Control<br>10mg/ml   | Yes |
| 47 | 9.3209  | 0.7281 | 0.6222 | Control<br>10mg/ml   | Cancerous<br>10mg/ml | No  |
| 48 | 9.2522  | 0.7067 | 0.6086 | Control<br>10mg/ml   | Control<br>10mg/ml   | Yes |
| 49 | 10.3510 | 0.8165 | 0.6753 | Cancerous<br>20mg/ml | Cancerous<br>20mg/ml | Yes |
| 50 | 10.1638 | 0.8234 | 0.6812 | Cancerous<br>20mg/ml | Cancerous<br>20mg/ml | Yes |
| 51 | 9.9331  | 0.8168 | 0.6759 | Cancerous<br>20mg/ml | Cancerous<br>20mg/ml | Yes |
| 52 | 9.9306  | 0.7987 | 0.6550 | Cancerous<br>20mg/ml | Cancerous<br>20mg/ml | Yes |
| 53 | 9.7727  | 0.7901 | 0.6503 | Cancerous<br>20mg/ml | Cancerous<br>20mg/ml | Yes |
| 54 | 9.5465  | 0.7705 | 0.6333 | Cancerous<br>20mg/ml | Cancerous<br>20mg/ml | Yes |
| 55 | 9.8393  | 0.7852 | 0.6487 | Cancerous<br>20mg/ml | Cancerous<br>20mg/ml | Yes |
| 56 | 9.7864  | 0.7672 | 0.6348 | Cancerous<br>20mg/ml | Cancerous<br>20mg/ml | Yes |
| 57 | 10.8695 | 0.7753 | 0.6703 | Control<br>20mg/ml   | Control<br>10mg/ml   | No  |
| 58 | 11.1050 | 0.7803 | 0.6751 | Control<br>20mg/ml   | Control<br>20mg/ml   | Yes |
| 59 | 11.0601 | 0.7753 | 0.6715 | Control<br>20mg/ml   | Control<br>20mg/ml   | Yes |
| 60 | 10.8145 | 0.7545 | 0.6533 | Control<br>20mg/ml   | Control<br>20mg/ml   | Yes |
| 61 | 10.5980 | 0.7566 | 0.6480 | Control<br>20mg/ml   | Control<br>10mg/ml   | No  |
| 62 | 10.4708 | 0.7527 | 0.6471 | Control<br>20mg/ml   | Control<br>10mg/ml   | No  |
| 63 | 10.5838 | 0.7436 | 0.6415 | Control<br>20mg/ml   | Control<br>10mg/ml   | No  |
| 64 | 10.4372 | 0.7354 | 0.6347 | Control<br>20mg/ml   | Control<br>10mg/ml   | No  |

**Table S9.** Fluorescent responses obtained from different concentrations of normal and cancerous mouse serum of transgenic lung model using PFS-PPE2 sensor.

| #  | Sample ID         | PFS    | PPE1   | FRET   |
|----|-------------------|--------|--------|--------|
| 1  | Cancerous 1mg/ml  | 3.2936 | 0.5505 | 0.5530 |
| 2  | Cancerous 1mg/ml  | 3.1927 | 0.5385 | 0.5410 |
| 3  | Cancerous 1mg/ml  | 3.3469 | 0.5419 | 0.5410 |
| 4  | Cancerous 1mg/ml  | 3.1327 | 0.5390 | 0.5300 |
| 5  | Cancerous 1mg/ml  | 3.0741 | 0.5121 | 0.5145 |
| 6  | Cancerous 1mg/ml  | 3.1362 | 0.5166 | 0.5113 |
| 7  | Cancerous 1mg/ml  | 3.0503 | 0.5219 | 0.5143 |
| 8  | Cancerous 1mg/ml  | 3.1256 | 0.5238 | 0.5084 |
| 9  | Control 1mg/ml    | 4.0552 | 0.5634 | 0.5607 |
| 10 | Control 1mg/ml    | 4.6826 | 0.5323 | 0.5586 |
| 11 | Control 1mg/ml    | 4.0054 | 0.5348 | 0.5496 |
| 12 | Control 1mg/ml    | 3.7307 | 0.5394 | 0.5394 |
| 13 | Control 1mg/ml    | 3.7315 | 0.5355 | 0.5387 |
| 14 | Control 1mg/ml    | 3.6722 | 0.5286 | 0.5307 |
| 15 | Control 1mg/ml    | 3.6267 | 0.5308 | 0.5264 |
| 16 | Control 1mg/ml    | 3.6397 | 0.5325 | 0.5241 |
| 17 | Cancerous 5mg/ml  | 5.2738 | 0.5978 | 0.5940 |
| 18 | Cancerous 5mg/ml  | 5.0283 | 0.5860 | 0.5788 |
| 19 | Cancerous 5mg/ml  | 4.9964 | 0.5917 | 0.5938 |
| 20 | Cancerous 5mg/ml  | 4.9582 | 0.5741 | 0.5653 |
| 21 | Cancerous 5mg/ml  | 4.8478 | 0.5929 | 0.5803 |
| 22 | Cancerous 5mg/ml  | 4.7459 | 0.5671 | 0.5577 |
| 23 | Cancerous 5mg/ml  | 4.6417 | 0.5713 | 0.5544 |
| 24 | Cancerous 5mg/ml  | 4.9375 | 0.5920 | 0.5837 |
| 25 | Control 5mg/ml    | 5.9655 | 0.5943 | 0.5959 |
| 26 | Control 5mg/ml    | 5.6713 | 0.5808 | 0.5700 |
| 27 | Control 5mg/ml    | 5.6959 | 0.5860 | 0.5760 |
| 28 | Control 5mg/ml    | 5.3900 | 0.5765 | 0.5670 |
| 29 | Control 5mg/ml    | 5.5432 | 0.5761 | 0.5723 |
| 30 | Control 5mg/ml    | 5.6301 | 0.5725 | 0.5720 |
| 31 | Control 5mg/ml    | 5.5589 | 0.5738 | 0.5619 |
| 32 | Control 5mg/ml    | 5.5972 | 0.5791 | 0.5722 |
| 33 | Cancerous 10mg/ml | 5.9241 | 0.6355 | 0.6164 |
| 34 | Cancerous 10mg/ml | 5.8673 | 0.6212 | 0.6017 |
| 35 | Cancerous 10mg/ml | 5.9303 | 0.6068 | 0.5897 |
| 36 | Cancerous 10mg/ml | 6.0079 | 0.6235 | 0.6095 |
| 37 | Cancerous 10mg/ml | 5.9276 | 0.6156 | 0.5960 |
| 38 | Cancerous 10mg/ml | 5.6499 | 0.5996 | 0.5857 |
| 39 | Cancerous 10mg/ml | 5.6449 | 0.6260 | 0.6105 |
| 40 | Cancerous 10mg/ml | 5.7008 | 0.6321 | 0.6084 |
| 41 | Control 10mg/ml   | 7.0758 | 0.6098 | 0.6191 |
| 42 | Control 10mg/ml   | 6.9402 | 0.6173 | 0.6079 |
| 43 | Control 10mg/ml   | 6.8399 | 0.6040 | 0.6062 |
| 44 | Control 10mg/ml   | 6.9129 | 0.6094 | 0.6088 |
| 45 | Control 10mg/ml   | 6.7863 | 0.5982 | 0.6042 |
| 46 | Control 10mg/ml   | 6.6608 | 0.6045 | 0.5907 |
| 47 | Control 10mg/ml   | 6.5155 | 0.6002 | 0.5964 |

|    |                   |        |        |        |
|----|-------------------|--------|--------|--------|
| 48 | Control 10mg/ml   | 6.6640 | 0.6147 | 0.6092 |
| 49 | Cancerous 20mg/ml | 7.3161 | 0.6431 | 0.6247 |
| 50 | Cancerous 20mg/ml | 7.3265 | 0.6499 | 0.6355 |
| 51 | Cancerous 20mg/ml | 7.0019 | 0.6539 | 0.6291 |
| 52 | Cancerous 20mg/ml | 6.9891 | 0.6460 | 0.6236 |
| 53 | Cancerous 20mg/ml | 7.1553 | 0.6517 | 0.6268 |
| 54 | Cancerous 20mg/ml | 6.7655 | 0.6331 | 0.6199 |
| 55 | Cancerous 20mg/ml | 6.9394 | 0.6416 | 0.6142 |
| 56 | Cancerous 20mg/ml | 6.9523 | 0.6523 | 0.6189 |
| 57 | Control 20mg/ml   | 7.9271 | 0.6447 | 0.6514 |
| 58 | Control 20mg/ml   | 8.0213 | 0.6343 | 0.6438 |
| 59 | Control 20mg/ml   | 7.8697 | 0.6338 | 0.6411 |
| 60 | Control 20mg/ml   | 7.8301 | 0.6477 | 0.6499 |
| 61 | Control 20mg/ml   | 7.6778 | 0.6289 | 0.6382 |
| 62 | Control 20mg/ml   | 7.6420 | 0.6350 | 0.6286 |
| 63 | Control 20mg/ml   | 7.4972 | 0.6237 | 0.6227 |
| 64 | Control 20mg/ml   | 7.4889 | 0.6124 | 0.6161 |

**Table S10.** Identification of the blinded unknowns from different concentrations of normal and cancerous mouse serum of transgenic lung model using PFS-PPE2 sensor.

| #  | PFS    | PPE1   | FRET   | True ID          | Identified as    | Correct identification |
|----|--------|--------|--------|------------------|------------------|------------------------|
| 1  | 2.2959 | 0.5385 | 0.5473 | Cancerous 1mg/ml | Cancerous 1mg/ml | Yes                    |
| 2  | 2.2865 | 0.5525 | 0.5443 | Cancerous 1mg/ml | Cancerous 1mg/ml | Yes                    |
| 3  | 2.2708 | 0.5616 | 0.5580 | Cancerous 1mg/ml | Cancerous 1mg/ml | Yes                    |
| 4  | 2.2015 | 0.5534 | 0.5427 | Cancerous 1mg/ml | Cancerous 1mg/ml | Yes                    |
| 5  | 2.4720 | 0.5386 | 0.5287 | Cancerous 1mg/ml | Cancerous 1mg/ml | Yes                    |
| 6  | 2.5746 | 0.5719 | 0.5645 | Cancerous 1mg/ml | Cancerous 1mg/ml | Yes                    |
| 7  | 2.3834 | 0.5407 | 0.5323 | Cancerous 1mg/ml | Cancerous 1mg/ml | Yes                    |
| 8  | 2.4611 | 0.5182 | 0.5244 | Cancerous 1mg/ml | Cancerous 1mg/ml | Yes                    |
| 9  | 2.6636 | 0.5450 | 0.5501 | Control 1mg/ml   | Cancerous 1mg/ml | No                     |
| 10 | 2.5820 | 0.5747 | 0.5571 | Control 1mg/ml   | Cancerous 1mg/ml | No                     |
| 11 | 2.5207 | 0.5772 | 0.5834 | Control 1mg/ml   | Cancerous 1mg/ml | No                     |
| 12 | 2.5097 | 0.5381 | 0.5426 | Control 1mg/ml   | Cancerous 1mg/ml | No                     |
| 13 | 2.5880 | 0.5283 | 0.5340 | Control 1mg/ml   | Cancerous 1mg/ml | No                     |
| 14 | 2.5357 | 0.5309 | 0.5295 | Control 1mg/ml   | Cancerous 1mg/ml | No                     |
| 15 | 2.5652 | 0.5197 | 0.5225 | Control 1mg/ml   | Cancerous 1mg/ml | No                     |

|    |        |        |        |                      |                     |    |
|----|--------|--------|--------|----------------------|---------------------|----|
| 16 | 2.5614 | 0.5102 | 0.5134 | Control<br>1mg/ml    | Cancerous<br>1mg/ml | No |
| 17 | 3.3872 | 0.5795 | 0.5646 | Cancerous<br>5mg/ml  | Cancerous<br>1mg/ml | No |
| 18 | 3.4192 | 0.5789 | 0.5812 | Cancerous<br>5mg/ml  | Cancerous<br>1mg/ml | No |
| 19 | 3.3734 | 0.5842 | 0.5655 | Cancerous<br>5mg/ml  | Cancerous<br>1mg/ml | No |
| 20 | 3.3260 | 0.5693 | 0.5619 | Cancerous<br>5mg/ml  | Cancerous<br>1mg/ml | No |
| 21 | 3.3576 | 0.5665 | 0.5628 | Cancerous<br>5mg/ml  | Cancerous<br>1mg/ml | No |
| 22 | 3.1698 | 0.5506 | 0.5433 | Cancerous<br>5mg/ml  | Cancerous<br>1mg/ml | No |
| 23 | 3.5413 | 0.5419 | 0.5427 | Cancerous<br>5mg/ml  | Cancerous<br>1mg/ml | No |
| 24 | 3.3301 | 0.5422 | 0.5360 | Cancerous<br>5mg/ml  | Cancerous<br>1mg/ml | No |
| 25 | 3.9082 | 0.5942 | 0.5842 | Control<br>5mg/ml    | Control<br>1mg/ml   | No |
| 26 | 3.8882 | 0.5935 | 0.5951 | Control<br>5mg/ml    | Cancerous<br>1mg/ml | No |
| 27 | 3.9374 | 0.5968 | 0.6113 | Control<br>5mg/ml    | Cancerous<br>1mg/ml | No |
| 28 | 3.6518 | 0.5639 | 0.5578 | Control<br>5mg/ml    | Cancerous<br>1mg/ml | No |
| 29 | 3.8243 | 0.5803 | 0.5764 | Control<br>5mg/ml    | Control<br>1mg/ml   | No |
| 30 | 3.7946 | 0.5677 | 0.5653 | Control<br>5mg/ml    | Control<br>1mg/ml   | No |
| 31 | 3.7949 | 0.5780 | 0.5732 | Control<br>5mg/ml    | Control<br>1mg/ml   | No |
| 32 | 3.7558 | 0.5451 | 0.5510 | Control<br>5mg/ml    | Control<br>1mg/ml   | No |
| 33 | 3.9977 | 0.6277 | 0.6099 | Cancerous<br>10mg/ml | Cancerous<br>5mg/ml | No |
| 34 | 4.0642 | 0.6361 | 0.6128 | Cancerous<br>10mg/ml | Cancerous<br>5mg/ml | No |
| 35 | 3.8818 | 0.6272 | 0.6062 | Cancerous<br>10mg/ml | Cancerous<br>1mg/ml | No |
| 36 | 3.8396 | 0.6046 | 0.5931 | Cancerous<br>10mg/ml | Cancerous<br>1mg/ml | No |
| 37 | 3.9416 | 0.5944 | 0.5883 | Cancerous<br>10mg/ml | Control<br>1mg/ml   | No |
| 38 | 3.7281 | 0.5832 | 0.5782 | Cancerous<br>10mg/ml | Cancerous<br>1mg/ml | No |
| 39 | 3.9798 | 0.6013 | 0.5872 | Cancerous<br>10mg/ml | Control<br>1mg/ml   | No |
| 40 | 3.9651 | 0.5861 | 0.5694 | Cancerous<br>10mg/ml | Control<br>1mg/ml   | No |
| 41 | 4.5504 | 0.6073 | 0.6180 | Control<br>10mg/ml   | Control<br>1mg/ml   | No |
| 42 | 4.5356 | 0.6344 | 0.6220 | Control<br>10mg/ml   | Cancerous<br>5mg/ml | No |
| 43 | 4.5449 | 0.6219 | 0.6229 | Control              | Cancerous           | No |

|    |        |        |        |                      |                     |    |
|----|--------|--------|--------|----------------------|---------------------|----|
|    |        |        |        | 10mg/ml              | 5mg/ml              |    |
| 44 | 4.5278 | 0.6051 | 0.6111 | Control<br>10mg/ml   | Control<br>1mg/ml   | No |
| 45 | 4.7324 | 0.6008 | 0.5996 | Control<br>10mg/ml   | Cancerous<br>5mg/ml | No |
| 46 | 4.4561 | 0.6012 | 0.6000 | Control<br>10mg/ml   | Cancerous<br>5mg/ml | No |
| 47 | 4.4317 | 0.5905 | 0.5879 | Control<br>10mg/ml   | Cancerous<br>5mg/ml | No |
| 48 | 4.3406 | 0.5772 | 0.5736 | Control<br>10mg/ml   | Control<br>1mg/ml   | No |
| 49 | 4.7347 | 0.6493 | 0.6371 | Cancerous<br>20mg/ml | Cancerous<br>5mg/ml | No |
| 50 | 4.8249 | 0.6645 | 0.6537 | Cancerous<br>20mg/ml | Cancerous<br>5mg/ml | No |
| 51 | 4.9163 | 0.6824 | 0.6584 | Cancerous<br>20mg/ml | Cancerous<br>5mg/ml | No |
| 52 | 4.6702 | 0.6556 | 0.6229 | Cancerous<br>20mg/ml | Cancerous<br>5mg/ml | No |
| 53 | 4.6299 | 0.6404 | 0.6214 | Cancerous<br>20mg/ml | Cancerous<br>5mg/ml | No |
| 54 | 4.6652 | 0.6453 | 0.6190 | Cancerous<br>20mg/ml | Cancerous<br>5mg/ml | No |
| 55 | 4.5049 | 0.6351 | 0.6080 | Cancerous<br>20mg/ml | Cancerous<br>5mg/ml | No |
| 56 | 4.4234 | 0.5965 | 0.5768 | Cancerous<br>20mg/ml | Cancerous<br>5mg/ml | No |
| 57 | 5.2642 | 0.6452 | 0.6592 | Control<br>20mg/ml   | Cancerous<br>5mg/ml | No |
| 58 | 5.2004 | 0.6343 | 0.6493 | Control<br>20mg/ml   | Cancerous<br>5mg/ml | No |
| 59 | 5.1551 | 0.6313 | 0.6488 | Control<br>20mg/ml   | Cancerous<br>5mg/ml | No |
| 60 | 4.9678 | 0.6170 | 0.6166 | Control<br>20mg/ml   | Cancerous<br>5mg/ml | No |
| 61 | 5.0301 | 0.6150 | 0.6235 | Control<br>20mg/ml   | Cancerous<br>5mg/ml | No |
| 62 | 4.9475 | 0.6229 | 0.6216 | Control<br>20mg/ml   | Cancerous<br>5mg/ml | No |
| 63 | 5.0173 | 0.6043 | 0.6048 | Control<br>20mg/ml   | Cancerous<br>5mg/ml | No |
| 64 | 4.7715 | 0.5914 | 0.5999 | Control<br>20mg/ml   | Cancerous<br>5mg/ml | No |

**Table S11.** Fluorescent responses obtained from 5 mg/ml total protein concentration of five normal and five cancerous mouse serum of transgenic lung model (stage 1) using PFS-PPE1 sensor.

| # | Sample ID | PFS    | PPE1   | FRET   |
|---|-----------|--------|--------|--------|
| 1 | M1-Normal | 8.0273 | 0.7253 | 0.6422 |
| 2 | M1-Normal | 8.3352 | 0.7313 | 0.6433 |
| 3 | M1-Normal | 8.1271 | 0.7336 | 0.6499 |
| 4 | M1-Normal | 7.7993 | 0.6996 | 0.6108 |
| 5 | M1-Normal | 8.0734 | 0.6827 | 0.6057 |

|    |              |        |        |        |
|----|--------------|--------|--------|--------|
| 6  | M1-Normal    | 7.9482 | 0.6944 | 0.6168 |
| 7  | M1-Normal    | 7.7727 | 0.6995 | 0.6226 |
| 8  | M1-Normal    | 7.9412 | 0.6826 | 0.6033 |
| 9  | M2-Normal    | 8.7375 | 0.7714 | 0.6810 |
| 10 | M2-Normal    | 8.9035 | 0.7628 | 0.6773 |
| 11 | M2-Normal    | 8.6279 | 0.7522 | 0.6665 |
| 12 | M2-Normal    | 8.5598 | 0.7428 | 0.6587 |
| 13 | M2-Normal    | 8.2624 | 0.7242 | 0.6343 |
| 14 | M2-Normal    | 8.3255 | 0.7289 | 0.6473 |
| 15 | M2-Normal    | 8.4375 | 0.7274 | 0.6440 |
| 16 | M2-Normal    | 8.4315 | 0.7158 | 0.6366 |
| 17 | M3-Normal    | 8.9241 | 0.7553 | 0.6677 |
| 18 | M3-Normal    | 8.5448 | 0.7123 | 0.6313 |
| 19 | M3-Normal    | 8.4588 | 0.7189 | 0.6380 |
| 20 | M3-Normal    | 8.0845 | 0.7021 | 0.6165 |
| 21 | M3-Normal    | 8.2500 | 0.6942 | 0.6143 |
| 22 | M3-Normal    | 8.3605 | 0.7114 | 0.6264 |
| 23 | M3-Normal    | 8.3688 | 0.7011 | 0.6223 |
| 24 | M3-Normal    | 7.8924 | 0.6783 | 0.5982 |
| 25 | M4-Normal    | 8.7305 | 0.7465 | 0.6609 |
| 26 | M4-Normal    | 8.5955 | 0.7445 | 0.6533 |
| 27 | M4-Normal    | 8.4798 | 0.7364 | 0.6504 |
| 28 | M4-Normal    | 8.6530 | 0.7394 | 0.6381 |
| 29 | M4-Normal    | 8.3152 | 0.7031 | 0.6176 |
| 30 | M4-Normal    | 8.1496 | 0.7127 | 0.6299 |
| 31 | M4-Normal    | 8.2520 | 0.7055 | 0.6183 |
| 32 | M4-Normal    | 8.3156 | 0.7207 | 0.6298 |
| 33 | M5-Normal    | 8.4595 | 0.7534 | 0.6769 |
| 34 | M5-Normal    | 8.3458 | 0.7481 | 0.6595 |
| 35 | M5-Normal    | 8.1716 | 0.7478 | 0.6644 |
| 36 | M5-Normal    | 8.2637 | 0.7430 | 0.6566 |
| 37 | M5-Normal    | 8.3278 | 0.7238 | 0.6428 |
| 38 | M5-Normal    | 8.0485 | 0.7232 | 0.6425 |
| 39 | M5-Normal    | 7.9385 | 0.7091 | 0.6244 |
| 40 | M5-Normal    | 8.2284 | 0.7256 | 0.6501 |
| 41 | M6-Cancerous | 7.3772 | 0.7876 | 0.7044 |
| 42 | M6-Cancerous | 7.6263 | 0.7869 | 0.7068 |
| 43 | M6-Cancerous | 7.5617 | 0.7906 | 0.7042 |
| 44 | M6-Cancerous | 7.3508 | 0.7650 | 0.6790 |
| 45 | M6-Cancerous | 7.5591 | 0.7628 | 0.6825 |
| 46 | M6-Cancerous | 7.0463 | 0.7353 | 0.6587 |
| 47 | M6-Cancerous | 7.1228 | 0.7523 | 0.6621 |
| 48 | M6-Cancerous | 7.1330 | 0.7451 | 0.6698 |
| 49 | M7-Cancerous | 7.6122 | 0.7816 | 0.7089 |
| 50 | M7-Cancerous | 7.6484 | 0.7880 | 0.6989 |
| 51 | M7-Cancerous | 7.6296 | 0.7811 | 0.6961 |
| 52 | M7-Cancerous | 7.3717 | 0.7520 | 0.6767 |
| 53 | M7-Cancerous | 7.3675 | 0.7567 | 0.6807 |



|    |               |        |        |        |
|----|---------------|--------|--------|--------|
| 54 | M7-Cancerous  | 7.2894 | 0.7445 | 0.6697 |
| 55 | M7-Cancerous  | 7.1524 | 0.7531 | 0.6698 |
| 56 | M7-Cancerous  | 7.2294 | 0.7453 | 0.6623 |
| 57 | M8-Cancerous  | 7.8987 | 0.7963 | 0.7020 |
| 58 | M8-Cancerous  | 7.9810 | 0.7888 | 0.7016 |
| 59 | M8-Cancerous  | 7.7373 | 0.7813 | 0.6925 |
| 60 | M8-Cancerous  | 7.7619 | 0.7715 | 0.6813 |
| 61 | M8-Cancerous  | 7.5538 | 0.7739 | 0.6825 |
| 62 | M8-Cancerous  | 7.4100 | 0.7443 | 0.6680 |
| 63 | M8-Cancerous  | 7.5789 | 0.7572 | 0.6728 |
| 64 | M8-Cancerous  | 7.5454 | 0.7593 | 0.6774 |
| 65 | M9-Cancerous  | 7.4147 | 0.7827 | 0.6994 |
| 66 | M9-Cancerous  | 7.4527 | 0.7930 | 0.7123 |
| 67 | M9-Cancerous  | 7.3143 | 0.7682 | 0.6884 |
| 68 | M9-Cancerous  | 7.1619 | 0.7503 | 0.6731 |
| 69 | M9-Cancerous  | 7.1569 | 0.7514 | 0.6733 |
| 70 | M9-Cancerous  | 7.1553 | 0.7415 | 0.6708 |
| 71 | M9-Cancerous  | 7.1123 | 0.7440 | 0.6669 |
| 72 | M9-Cancerous  | 6.9563 | 0.7583 | 0.6733 |
| 73 | M10-Cancerous | 7.6472 | 0.7643 | 0.6966 |
| 74 | M10-Cancerous | 7.8859 | 0.7898 | 0.7214 |
| 75 | M10-Cancerous | 7.7815 | 0.7714 | 0.7000 |
| 76 | M10-Cancerous | 7.4236 | 0.7563 | 0.6824 |
| 77 | M10-Cancerous | 7.5260 | 0.7385 | 0.6740 |
| 78 | M10-Cancerous | 7.3664 | 0.7430 | 0.6670 |
| 79 | M10-Cancerous | 7.2639 | 0.7371 | 0.6574 |
| 80 | M10-Cancerous | 7.3532 | 0.7470 | 0.6757 |

**Table S12.** Identification of the blinded unknowns from 5 mg/ml total protein concentration of five normal and five cancerous mouse serum of transgenic lung model (stage 1) using PFS-PPE1 sensor.

| #  | PFS    | PPE1   | FRET   | True ID   | Identified as | Correct identification |
|----|--------|--------|--------|-----------|---------------|------------------------|
| 1  | 8.3317 | 0.7701 | 0.6862 | M1-Normal | Normal        | Yes                    |
| 2  | 8.1884 | 0.7568 | 0.6681 | M1-Normal | Normal        | Yes                    |
| 3  | 8.0241 | 0.7409 | 0.6625 | M1-Normal | Normal        | Yes                    |
| 4  | 7.9677 | 0.7296 | 0.6471 | M1-Normal | Normal        | Yes                    |
| 5  | 7.5858 | 0.7120 | 0.6272 | M1-Normal | Normal        | Yes                    |
| 6  | 7.8113 | 0.6925 | 0.6203 | M1-Normal | Normal        | Yes                    |
| 7  | 7.5934 | 0.6924 | 0.6195 | M1-Normal | Normal        | Yes                    |
| 8  | 7.7969 | 0.7090 | 0.6305 | M1-Normal | Normal        | Yes                    |
| 9  | 8.9109 | 0.7989 | 0.7086 | M2-Normal | Normal        | Yes                    |
| 10 | 8.6968 | 0.7794 | 0.6881 | M2-Normal | Normal        | Yes                    |
| 11 | 9.2398 | 0.8015 | 0.7105 | M2-Normal | Normal        | Yes                    |
| 12 | 8.5520 | 0.7511 | 0.6714 | M2-Normal | Normal        | Yes                    |
| 13 | 8.5932 | 0.7760 | 0.6892 | M2-Normal | Normal        | Yes                    |
| 14 | 8.5753 | 0.7636 | 0.6736 | M2-Normal | Normal        | Yes                    |
| 15 | 8.7263 | 0.7866 | 0.6969 | M2-Normal | Normal        | Yes                    |

|    |        |        |        |              |           |     |
|----|--------|--------|--------|--------------|-----------|-----|
| 16 | 8.4793 | 0.7391 | 0.6460 | M2-Normal    | Normal    | Yes |
| 17 | 8.6161 | 0.7513 | 0.6643 | M3-Normal    | Normal    | Yes |
| 18 | 8.6097 | 0.7467 | 0.6606 | M3-Normal    | Normal    | Yes |
| 19 | 8.4838 | 0.7483 | 0.6701 | M3-Normal    | Normal    | Yes |
| 20 | 8.7168 | 0.7075 | 0.6400 | M3-Normal    | Normal    | Yes |
| 21 | 8.2786 | 0.7347 | 0.6477 | M3-Normal    | Normal    | Yes |
| 22 | 7.9185 | 0.6856 | 0.6114 | M3-Normal    | Normal    | Yes |
| 23 | 8.0658 | 0.6999 | 0.6155 | M3-Normal    | Normal    | Yes |
| 24 | 8.0100 | 0.6965 | 0.6175 | M3-Normal    | Normal    | Yes |
| 25 | 9.0672 | 0.7859 | 0.6973 | M4-Normal    | Normal    | Yes |
| 26 | 8.7300 | 0.7821 | 0.6835 | M4-Normal    | Normal    | Yes |
| 27 | 8.8183 | 0.7873 | 0.6955 | M4-Normal    | Normal    | Yes |
| 28 | 8.6919 | 0.7417 | 0.6519 | M4-Normal    | Normal    | Yes |
| 29 | 8.5950 | 0.7536 | 0.6582 | M4-Normal    | Normal    | Yes |
| 30 | 8.3316 | 0.7402 | 0.6433 | M4-Normal    | Normal    | Yes |
| 31 | 8.4285 | 0.7366 | 0.6468 | M4-Normal    | Normal    | Yes |
| 32 | 8.0993 | 0.7172 | 0.6243 | M4-Normal    | Normal    | Yes |
| 33 | 8.1788 | 0.7757 | 0.6961 | M5-Normal    | Cancerous | No  |
| 34 | 8.8465 | 0.7698 | 0.6936 | M5-Normal    | Normal    | Yes |
| 35 | 8.6846 | 0.7731 | 0.6933 | M5-Normal    | Normal    | Yes |
| 36 | 8.0130 | 0.7407 | 0.6594 | M5-Normal    | Normal    | Yes |
| 37 | 7.8903 | 0.7401 | 0.6625 | M5-Normal    | Normal    | Yes |
| 38 | 7.5601 | 0.7096 | 0.6355 | M5-Normal    | Normal    | Yes |
| 39 | 7.8137 | 0.7201 | 0.6460 | M5-Normal    | Normal    | Yes |
| 40 | 7.7983 | 0.7257 | 0.6390 | M5-Normal    | Normal    | Yes |
| 41 | 7.4780 | 0.7652 | 0.6871 | M6-Cancerous | Cancerous | Yes |
| 42 | 7.3533 | 0.7747 | 0.6915 | M6-Cancerous | Cancerous | Yes |
| 43 | 7.3370 | 0.7622 | 0.6847 | M6-Cancerous | Cancerous | Yes |
| 44 | 7.0681 | 0.7270 | 0.6592 | M6-Cancerous | Cancerous | Yes |
| 45 | 7.2882 | 0.7431 | 0.6595 | M6-Cancerous | Cancerous | Yes |
| 46 | 7.4228 | 0.7436 | 0.6657 | M6-Cancerous | Cancerous | Yes |
| 47 | 7.1043 | 0.7307 | 0.6569 | M6-Cancerous | Cancerous | Yes |
| 48 | 6.9881 | 0.7493 | 0.6681 | M6-Cancerous | Cancerous | Yes |
| 49 | 7.5183 | 0.7614 | 0.6850 | M7-Cancerous | Cancerous | Yes |
| 50 | 7.7548 | 0.7862 | 0.6998 | M7-Cancerous | Cancerous | Yes |
| 51 | 7.6099 | 0.7787 | 0.6981 | M7-Cancerous | Cancerous | Yes |
| 52 | 7.3263 | 0.7365 | 0.6636 | M7-Cancerous | Cancerous | Yes |
| 53 | 7.3616 | 0.7571 | 0.6791 | M7-Cancerous | Cancerous | Yes |
| 54 | 7.4654 | 0.7671 | 0.6805 | M7-Cancerous | Cancerous | Yes |
| 55 | 7.2153 | 0.7567 | 0.6785 | M7-Cancerous | Cancerous | Yes |
| 56 | 7.2098 | 0.7480 | 0.6685 | M7-Cancerous | Cancerous | Yes |
| 57 | 7.8795 | 0.7806 | 0.6912 | M8-Cancerous | Cancerous | Yes |
| 58 | 7.9396 | 0.7914 | 0.7127 | M8-Cancerous | Cancerous | Yes |
| 59 | 7.7182 | 0.7724 | 0.6899 | M8-Cancerous | Cancerous | Yes |
| 60 | 7.4748 | 0.7395 | 0.6637 | M8-Cancerous | Cancerous | Yes |
| 61 | 7.4428 | 0.7508 | 0.6628 | M8-Cancerous | Cancerous | Yes |
| 62 | 7.3110 | 0.7525 | 0.6670 | M8-Cancerous | Cancerous | Yes |
| 63 | 7.4098 | 0.7454 | 0.6717 | M8-Cancerous | Cancerous | Yes |

|    |        |        |        |               |           |     |
|----|--------|--------|--------|---------------|-----------|-----|
| 64 | 7.4614 | 0.7572 | 0.6749 | M8-Cancerous  | Cancerous | Yes |
| 65 | 7.4107 | 0.7704 | 0.6929 | M9-Cancerous  | Cancerous | Yes |
| 66 | 7.3539 | 0.7867 | 0.7032 | M9-Cancerous  | Cancerous | Yes |
| 67 | 7.3468 | 0.7698 | 0.6960 | M9-Cancerous  | Cancerous | Yes |
| 68 | 7.1368 | 0.7428 | 0.6661 | M9-Cancerous  | Cancerous | Yes |
| 69 | 7.1598 | 0.7639 | 0.6770 | M9-Cancerous  | Cancerous | Yes |
| 70 | 7.0086 | 0.7725 | 0.6943 | M9-Cancerous  | Cancerous | Yes |
| 71 | 7.0797 | 0.7602 | 0.6777 | M9-Cancerous  | Cancerous | Yes |
| 72 | 6.9225 | 0.7566 | 0.6723 | M9-Cancerous  | Cancerous | Yes |
| 73 | 7.8216 | 0.7550 | 0.6889 | M10-Cancerous | Cancerous | Yes |
| 74 | 7.8264 | 0.7844 | 0.7088 | M10-Cancerous | Cancerous | Yes |
| 75 | 7.7420 | 0.7597 | 0.6992 | M10-Cancerous | Cancerous | Yes |
| 76 | 7.4915 | 0.7455 | 0.6780 | M10-Cancerous | Cancerous | Yes |
| 77 | 7.4991 | 0.7460 | 0.6739 | M10-Cancerous | Cancerous | Yes |
| 78 | 7.3530 | 0.7535 | 0.6772 | M10-Cancerous | Cancerous | Yes |
| 79 | 7.3258 | 0.7590 | 0.6819 | M10-Cancerous | Cancerous | Yes |
| 80 | 7.2939 | 0.7392 | 0.6740 | M10-Cancerous | Cancerous | Yes |

**Table S13.** Fluorescent responses obtained from 5 mg/ml total protein concentration of five normal and five cancerous mouse serum of experimental lung model (stage 4) using PFS-PPE1 sensor.

| #  | Sample ID | PFS    | PPE1   | FRET   |
|----|-----------|--------|--------|--------|
| 1  | M1-Normal | 8.5537 | 0.6677 | 0.5962 |
| 2  | M1-Normal | 8.3282 | 0.6682 | 0.5985 |
| 3  | M1-Normal | 8.6669 | 0.6748 | 0.6124 |
| 4  | M1-Normal | 8.3621 | 0.6543 | 0.5900 |
| 5  | M1-Normal | 8.2975 | 0.6517 | 0.5853 |
| 6  | M1-Normal | 8.2191 | 0.6470 | 0.5802 |
| 7  | M1-Normal | 8.1844 | 0.6545 | 0.5774 |
| 8  | M1-Normal | 8.1992 | 0.6315 | 0.5700 |
| 9  | M2-Normal | 9.3529 | 0.7181 | 0.6292 |
| 10 | M2-Normal | 9.3604 | 0.7300 | 0.6369 |
| 11 | M2-Normal | 9.0127 | 0.6997 | 0.6154 |
| 12 | M2-Normal | 9.0765 | 0.7080 | 0.6144 |
| 13 | M2-Normal | 8.9042 | 0.6849 | 0.6020 |
| 14 | M2-Normal | 8.8373 | 0.6898 | 0.5953 |
| 15 | M2-Normal | 8.9133 | 0.6981 | 0.6040 |
| 16 | M2-Normal | 8.7562 | 0.6730 | 0.5792 |
| 17 | M3-Normal | 8.9275 | 0.7163 | 0.6257 |
| 18 | M3-Normal | 8.7581 | 0.7028 | 0.6183 |
| 19 | M3-Normal | 8.8240 | 0.6981 | 0.6134 |
| 20 | M3-Normal | 8.8354 | 0.6846 | 0.6076 |
| 21 | M3-Normal | 8.5960 | 0.6719 | 0.5899 |
| 22 | M3-Normal | 8.3215 | 0.6625 | 0.5787 |
| 23 | M3-Normal | 8.4338 | 0.6754 | 0.5919 |
| 24 | M3-Normal | 8.4354 | 0.6743 | 0.5911 |
| 25 | M4-Normal | 8.9890 | 0.6957 | 0.6179 |
| 26 | M4-Normal | 9.3274 | 0.7210 | 0.6406 |

|    |               |        |        |        |
|----|---------------|--------|--------|--------|
| 27 | M4-Normal     | 8.9497 | 0.7036 | 0.6197 |
| 28 | M4-Normal     | 8.9821 | 0.7040 | 0.6119 |
| 29 | M4-Normal     | 8.7273 | 0.6797 | 0.6007 |
| 30 | M4-Normal     | 8.5919 | 0.6898 | 0.6027 |
| 31 | M4-Normal     | 8.6707 | 0.6799 | 0.5971 |
| 32 | M4-Normal     | 8.6049 | 0.6684 | 0.5837 |
| 33 | M5-Normal     | 8.9877 | 0.7108 | 0.6240 |
| 34 | M5-Normal     | 9.0816 | 0.7183 | 0.6259 |
| 35 | M5-Normal     | 8.9942 | 0.6982 | 0.6135 |
| 36 | M5-Normal     | 8.8895 | 0.6831 | 0.6069 |
| 37 | M5-Normal     | 8.5719 | 0.6731 | 0.5913 |
| 38 | M5-Normal     | 8.4560 | 0.6695 | 0.5833 |
| 39 | M5-Normal     | 8.5831 | 0.6781 | 0.5962 |
| 40 | M5-Normal     | 8.4375 | 0.6491 | 0.5675 |
| 41 | M6-Cancerous  | 8.0154 | 0.7070 | 0.6189 |
| 42 | M6-Cancerous  | 7.9643 | 0.7093 | 0.6233 |
| 43 | M6-Cancerous  | 7.8853 | 0.7161 | 0.6174 |
| 44 | M6-Cancerous  | 7.9011 | 0.6941 | 0.6064 |
| 45 | M6-Cancerous  | 7.5974 | 0.6661 | 0.5897 |
| 46 | M6-Cancerous  | 7.5524 | 0.6787 | 0.5892 |
| 47 | M6-Cancerous  | 7.4506 | 0.6733 | 0.5894 |
| 48 | M6-Cancerous  | 7.5831 | 0.6810 | 0.5977 |
| 49 | M7-Cancerous  | 7.8787 | 0.7414 | 0.6760 |
| 50 | M7-Cancerous  | 7.7294 | 0.7234 | 0.6508 |
| 51 | M7-Cancerous  | 7.9322 | 0.7223 | 0.6588 |
| 52 | M7-Cancerous  | 7.7026 | 0.7003 | 0.6334 |
| 53 | M7-Cancerous  | 7.7479 | 0.7087 | 0.6399 |
| 54 | M7-Cancerous  | 7.5779 | 0.6904 | 0.6196 |
| 55 | M7-Cancerous  | 7.7055 | 0.6915 | 0.6271 |
| 56 | M7-Cancerous  | 7.5403 | 0.6832 | 0.6241 |
| 57 | M8-Cancerous  | 8.6513 | 0.7355 | 0.6450 |
| 58 | M8-Cancerous  | 8.3887 | 0.7278 | 0.6371 |
| 59 | M8-Cancerous  | 8.5111 | 0.7433 | 0.6493 |
| 60 | M8-Cancerous  | 8.3970 | 0.7222 | 0.6286 |
| 61 | M8-Cancerous  | 8.1696 | 0.7088 | 0.6151 |
| 62 | M8-Cancerous  | 7.8973 | 0.6857 | 0.5939 |
| 63 | M8-Cancerous  | 8.1674 | 0.7080 | 0.6137 |
| 64 | M8-Cancerous  | 8.1702 | 0.7127 | 0.6229 |
| 65 | M9-Cancerous  | 7.5192 | 0.7218 | 0.6551 |
| 66 | M9-Cancerous  | 7.3663 | 0.7211 | 0.6452 |
| 67 | M9-Cancerous  | 7.2437 | 0.7096 | 0.6416 |
| 68 | M9-Cancerous  | 7.1945 | 0.6917 | 0.6234 |
| 69 | M9-Cancerous  | 7.0872 | 0.6703 | 0.6163 |
| 70 | M9-Cancerous  | 7.0960 | 0.6668 | 0.6123 |
| 71 | M9-Cancerous  | 7.1433 | 0.6695 | 0.6149 |
| 72 | M9-Cancerous  | 7.1186 | 0.6746 | 0.6155 |
| 73 | M10-Cancerous | 7.7634 | 0.7052 | 0.6244 |
| 74 | M10-Cancerous | 7.9038 | 0.7132 | 0.6411 |

|    |               |        |        |        |
|----|---------------|--------|--------|--------|
| 75 | M10-Cancerous | 7.7745 | 0.7024 | 0.6279 |
| 76 | M10-Cancerous | 7.4023 | 0.6870 | 0.6121 |
| 77 | M10-Cancerous | 7.6719 | 0.6828 | 0.6111 |
| 78 | M10-Cancerous | 7.4619 | 0.6640 | 0.5958 |
| 79 | M10-Cancerous | 7.4378 | 0.6666 | 0.5951 |
| 80 | M10-Cancerous | 7.4092 | 0.6519 | 0.5772 |

**Table S14.** Identification of the blinded unknowns from 5 mg/ml total protein concentration of five normal and five cancerous mouse serum of experimental (stage 4) lung model using PFS-PPE1 sensor.

| #  | PFS    | PPE1   | FRET   | True ID   | Identified as | Correct identification |
|----|--------|--------|--------|-----------|---------------|------------------------|
| 1  | 8.5163 | 0.7028 | 0.6259 | M1-Normal | Normal        | Yes                    |
| 2  | 8.4571 | 0.6813 | 0.6085 | M1-Normal | Normal        | Yes                    |
| 3  | 8.1897 | 0.6552 | 0.5999 | M1-Normal | Normal        | Yes                    |
| 4  | 8.4050 | 0.6777 | 0.6055 | M1-Normal | Normal        | Yes                    |
| 5  | 8.3398 | 0.6673 | 0.5998 | M1-Normal | Normal        | Yes                    |
| 6  | 8.0952 | 0.6558 | 0.5814 | M1-Normal | Normal        | Yes                    |
| 7  | 7.9275 | 0.6419 | 0.5727 | M1-Normal | Normal        | Yes                    |
| 8  | 7.9902 | 0.6234 | 0.5600 | M1-Normal | Normal        | Yes                    |
| 9  | 9.1351 | 0.7170 | 0.6258 | M2-Normal | Normal        | Yes                    |
| 10 | 9.2393 | 0.7181 | 0.6326 | M2-Normal | Normal        | Yes                    |
| 11 | 8.6288 | 0.6845 | 0.5982 | M2-Normal | Normal        | Yes                    |
| 12 | 9.0509 | 0.7172 | 0.6253 | M2-Normal | Normal        | Yes                    |
| 13 | 9.1092 | 0.7158 | 0.6225 | M2-Normal | Normal        | Yes                    |
| 14 | 8.7375 | 0.6817 | 0.5915 | M2-Normal | Normal        | Yes                    |
| 15 | 8.6271 | 0.6844 | 0.5917 | M2-Normal | Normal        | Yes                    |
| 16 | 8.6014 | 0.6677 | 0.5848 | M2-Normal | Normal        | Yes                    |
| 17 | 8.7592 | 0.6995 | 0.6215 | M3-Normal | Normal        | Yes                    |
| 18 | 8.5595 | 0.6929 | 0.6144 | M3-Normal | Normal        | Yes                    |
| 19 | 8.1345 | 0.6705 | 0.5941 | M3-Normal | Normal        | Yes                    |
| 20 | 8.4680 | 0.6883 | 0.6065 | M3-Normal | Normal        | Yes                    |
| 21 | 8.5145 | 0.6716 | 0.5975 | M3-Normal | Normal        | Yes                    |
| 22 | 8.1767 | 0.6449 | 0.5748 | M3-Normal | Normal        | Yes                    |
| 23 | 8.1367 | 0.6637 | 0.5888 | M3-Normal | Normal        | Yes                    |
| 24 | 8.1404 | 0.6495 | 0.5735 | M3-Normal | Normal        | Yes                    |
| 25 | 8.8862 | 0.7076 | 0.6265 | M4-Normal | Normal        | Yes                    |
| 26 | 8.7308 | 0.6958 | 0.6141 | M4-Normal | Normal        | Yes                    |
| 27 | 8.4463 | 0.6754 | 0.5996 | M4-Normal | Normal        | Yes                    |
| 28 | 8.7279 | 0.6926 | 0.6115 | M4-Normal | Normal        | Yes                    |
| 29 | 8.8106 | 0.6896 | 0.6089 | M4-Normal | Normal        | Yes                    |
| 30 | 8.3444 | 0.6640 | 0.5791 | M4-Normal | Normal        | Yes                    |
| 31 | 8.4909 | 0.6695 | 0.5913 | M4-Normal | Normal        | Yes                    |
| 32 | 8.4035 | 0.6523 | 0.5735 | M4-Normal | Normal        | Yes                    |
| 33 | 9.0291 | 0.7076 | 0.6186 | M5-Normal | Normal        | Yes                    |
| 34 | 8.6506 | 0.6830 | 0.6014 | M5-Normal | Normal        | Yes                    |
| 35 | 8.5888 | 0.6689 | 0.5928 | M5-Normal | Normal        | Yes                    |
| 36 | 9.1611 | 0.7088 | 0.6226 | M5-Normal | Normal        | Yes                    |
| 37 | 8.5303 | 0.6787 | 0.5974 | M5-Normal | Normal        | Yes                    |

|    |        |        |        |               |           |     |
|----|--------|--------|--------|---------------|-----------|-----|
| 38 | 8.3219 | 0.6615 | 0.5789 | M5-Normal     | Normal    | Yes |
| 39 | 8.4040 | 0.6613 | 0.5866 | M5-Normal     | Normal    | Yes |
| 40 | 8.3008 | 0.6528 | 0.5808 | M5-Normal     | Normal    | Yes |
| 41 | 7.8361 | 0.7100 | 0.6218 | M6-Cancerous  | Cancerous | Yes |
| 42 | 7.8674 | 0.6919 | 0.6064 | M6-Cancerous  | Cancerous | Yes |
| 43 | 7.7642 | 0.7064 | 0.6106 | M6-Cancerous  | Cancerous | Yes |
| 44 | 7.6370 | 0.6852 | 0.5944 | M6-Cancerous  | Cancerous | Yes |
| 45 | 7.4179 | 0.6793 | 0.5924 | M6-Cancerous  | Cancerous | Yes |
| 46 | 7.3765 | 0.6645 | 0.5808 | M6-Cancerous  | Cancerous | Yes |
| 47 | 7.5359 | 0.6697 | 0.5875 | M6-Cancerous  | Cancerous | Yes |
| 48 | 7.6065 | 0.6830 | 0.5994 | M6-Cancerous  | Cancerous | Yes |
| 49 | 8.0575 | 0.7424 | 0.6755 | M7-Cancerous  | Cancerous | Yes |
| 50 | 7.9020 | 0.7180 | 0.6593 | M7-Cancerous  | Cancerous | Yes |
| 51 | 7.7754 | 0.7098 | 0.6492 | M7-Cancerous  | Cancerous | Yes |
| 52 | 7.5770 | 0.6972 | 0.6333 | M7-Cancerous  | Cancerous | Yes |
| 53 | 7.6941 | 0.7046 | 0.6404 | M7-Cancerous  | Cancerous | Yes |
| 54 | 7.4558 | 0.6787 | 0.6211 | M7-Cancerous  | Cancerous | Yes |
| 55 | 7.8469 | 0.6925 | 0.6325 | M7-Cancerous  | Cancerous | Yes |
| 56 | 7.5507 | 0.6847 | 0.6322 | M7-Cancerous  | Cancerous | Yes |
| 57 | 8.6864 | 0.7362 | 0.6516 | M8-Cancerous  | Cancerous | Yes |
| 58 | 8.5119 | 0.7212 | 0.6366 | M8-Cancerous  | Cancerous | Yes |
| 59 | 8.2514 | 0.7239 | 0.6379 | M8-Cancerous  | Cancerous | Yes |
| 60 | 8.3107 | 0.7005 | 0.6122 | M8-Cancerous  | Cancerous | Yes |
| 61 | 8.1421 | 0.6955 | 0.6079 | M8-Cancerous  | Cancerous | Yes |
| 62 | 8.3108 | 0.7081 | 0.6143 | M8-Cancerous  | Cancerous | Yes |
| 63 | 7.8615 | 0.6903 | 0.6020 | M8-Cancerous  | Cancerous | Yes |
| 64 | 8.1470 | 0.7026 | 0.6120 | M8-Cancerous  | Cancerous | Yes |
| 65 | 7.2796 | 0.7367 | 0.6714 | M9-Cancerous  | Cancerous | Yes |
| 66 | 7.3324 | 0.7237 | 0.6628 | M9-Cancerous  | Cancerous | Yes |
| 67 | 7.1535 | 0.6983 | 0.6392 | M9-Cancerous  | Cancerous | Yes |
| 68 | 7.3592 | 0.7078 | 0.6434 | M9-Cancerous  | Cancerous | Yes |
| 69 | 6.9613 | 0.6867 | 0.6276 | M9-Cancerous  | Cancerous | Yes |
| 70 | 6.9753 | 0.6651 | 0.6094 | M9-Cancerous  | Cancerous | Yes |
| 71 | 7.0476 | 0.6696 | 0.6143 | M9-Cancerous  | Cancerous | Yes |
| 72 | 7.1991 | 0.6785 | 0.6282 | M9-Cancerous  | Cancerous | Yes |
| 73 | 7.7439 | 0.7375 | 0.6459 | M10-Cancerous | Cancerous | Yes |
| 74 | 7.6959 | 0.6847 | 0.6145 | M10-Cancerous | Cancerous | Yes |
| 75 | 7.7789 | 0.6943 | 0.6220 | M10-Cancerous | Cancerous | Yes |
| 76 | 7.4966 | 0.6894 | 0.6160 | M10-Cancerous | Cancerous | Yes |
| 77 | 7.3363 | 0.6792 | 0.6049 | M10-Cancerous | Cancerous | Yes |
| 78 | 7.5062 | 0.6721 | 0.5974 | M10-Cancerous | Cancerous | Yes |
| 79 | 7.3423 | 0.6649 | 0.5941 | M10-Cancerous | Cancerous | Yes |
| 80 | 7.3182 | 0.6645 | 0.5888 | M10-Cancerous | Cancerous | Yes |

## Reference

- (1) Han, J. S.; Bender, M.; Hahn, S.; Seehafer, K.; Bunz, U. H. F. *Chem. Eur. J.* **2016**, *22*, 3230-3233.
- (2) Han, J. S.; Wang, B. H.; Bender, M.; Seehafer, K.; Bunz, U. H. F. *ACS Appl. Mater. Interfaces* **2016**, *8*, 20415-20421.
- (3) Downey, C. M.; Aghaei, M.; Schwendener, R. A.; Jirik, F. R. *Plos One* **2014**, *9*, e99988.

- 
- (4) Singla, A. K.; Downey, C. M.; Bebb, G. D.; Jirik, F. R. *Oncoscience* **2015**, 2, 263-271.
- (5) Venables, W. N. & Ripley, B. D. (2002). *Modern Applied Statistics with S*. Fourth Edition. Springer, New York. ISBN 0-387-95457-0.
